# Supplementary material for: Novel triazole nucleoside analogues promote anticancer activity via both apoptosis and autophagy
Source: Royal Society of Chemistry journal article supplement (doi:10.1039/d0cc04660d), 2020-01-01

## Supporting Information

### Novel Triazole Nucleoside Analogues Promotes Anticancer Activity via Both Apoptosis and Autophagy

Yanhua Zhang<sup>†,#</sup>, Xi Liu<sup>†,#</sup>, Yun Lin<sup>†</sup>, Baoping Lian<sup>†</sup>, Wenjun Lan<sup>‡,§</sup>, Juan L. Iovanna<sup>§</sup>,  
Xiaoxuan Liu<sup>†\*</sup>, Ling Peng<sup>‡</sup>, Yi Xia<sup>†\*</sup>

<sup>†</sup> Chongqing Key Laboratory of Natural Product Synthesis and Drug Research, School of Pharmaceutical Sciences, Chongqing University, 401331, Chongqing, China

<sup>#</sup> State Key Laboratory of Natural Medicines and Jiangsu Key Laboratory of Drug Discovery for Metabolic Diseases, Center of Advanced Pharmaceuticals and Biomaterials, China Pharmaceutical University, Nanjing 210009, P. R. China

<sup>‡</sup> Centre Interdisciplinaire de Nanoscience de Marseille, Aix-Marseille Université, CNRS, UMR 7325, 13288, Marseille, France

<sup>§</sup> Centre de Recherche en Cancérologie de Marseille (CRCM), INSERM U1068, CNRS UMR 7258, Aix-Marseille Université and Institut Paoli-Calmettes, 13288, Marseille, France

## Table of Contents

|                                                       |     |
|-------------------------------------------------------|-----|
| Figure S1 .....                                       | S3  |
| Figure S2 .....                                       | S4  |
| Figure S3 .....                                       | S5  |
| General .....                                         | S6  |
| Synthesis of compound <b>I</b> .....                  | S6  |
| Cell culture .....                                    | S11 |
| Reagents and Antibodies.....                          | S12 |
| Cell growth inhibition assay .....                    | S12 |
| Visualization of cell morphology via microscopy ..... | S13 |
| In vivo study in mice model.....                      | S13 |
| Apoptosis and necrosis assay on flow cytometry .....  | S15 |
| Western Blotting .....                                | S15 |
| Immunofluorescence assay .....                        | S16 |
| <sup>1</sup> H, <sup>12</sup> C-NMR spectra .....     | S17 |
| HPLC spectra .....                                    | S33 |

**Figure S1.** Inhibitor of necroptosis, necrostatin-1, did not show notable effect on the antiproliferative activity of **If**. Panc-1 cells were treated with **If** at various concentrations in the presence and absence of necrostatin-1 (50  $\mu$ M).

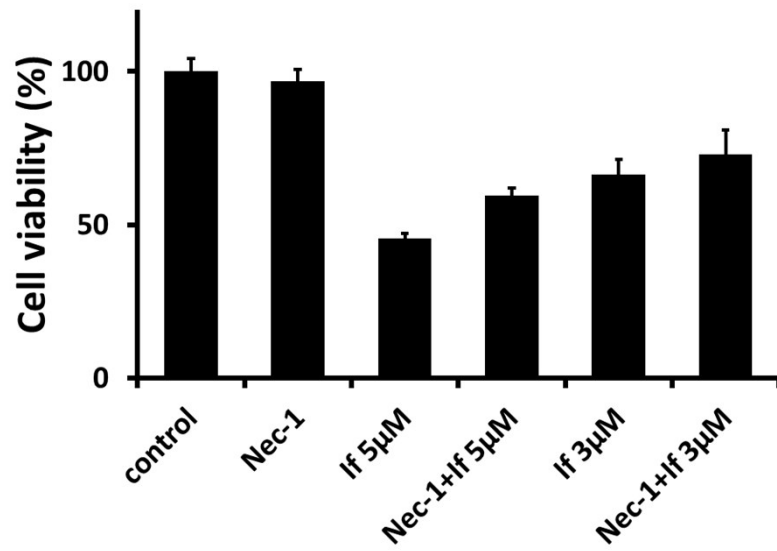

**Figure S2.** A) The co-treatment of paraptosis inhibitor, cycloheximide, with **If** enhanced the antiproliferative activity of **If** instead of rescuing the cells. Panc-1 cells were treated with **If** at various concentrations in the presence and absence of cycloheximide (10  $\mu$ M). B) Phase-contrast images show the morphological change of Panc-1 cells treated with **If** at indicated time points from 0–48 h. All images were recorded at the same magnification.

**A**

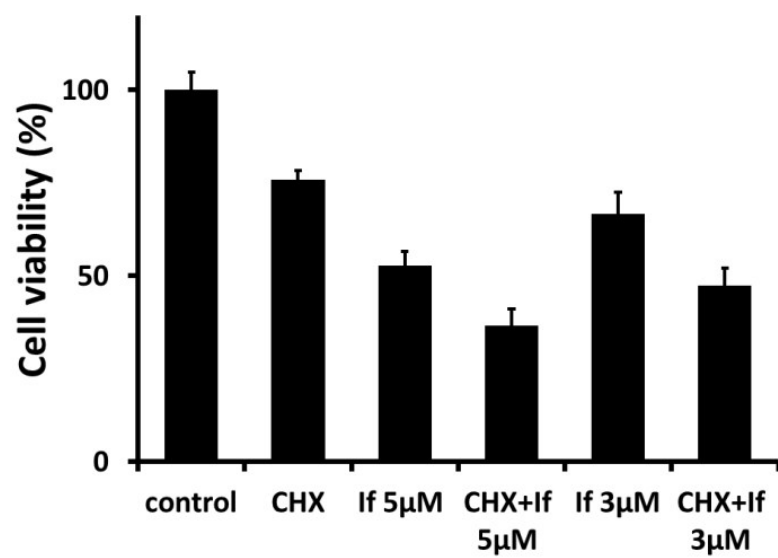

**B**

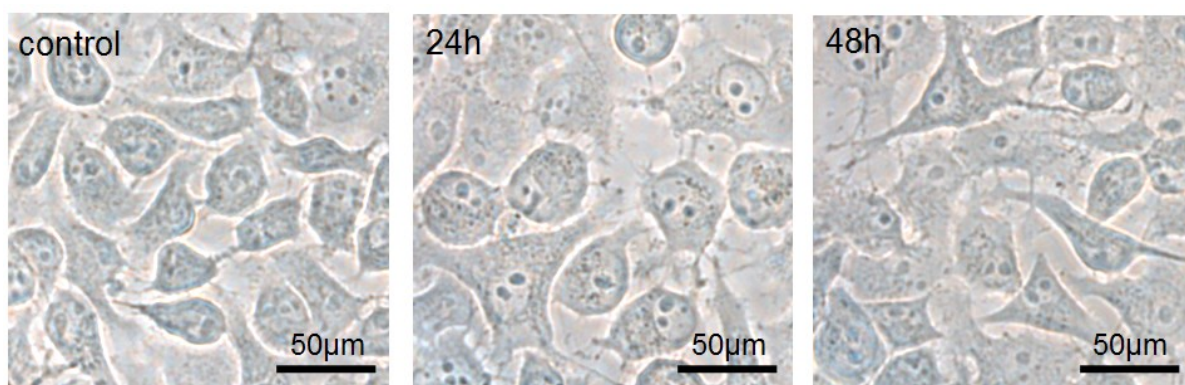

**Figure S3.** No adverse effect was observed on mice weight with the treatment of **If**. (A) Nude mice bearing Panc-1 tumors of 100 mm<sup>3</sup> were randomly selected for various treatments. **If** was injected intraperitoneally (20 mg/kg) for 4 weeks. The tumor volumes were measured twice a week. All of the results were expressed as the mean  $\pm$  S.E (n = 5). Points, means of analysis; bars, standard errors. (B) Mouse organs including the heart, liver, spleen, lung, and kidneys were sectioned and stained by H&E to evaluate tissue inflammation and structural damage.

**A**

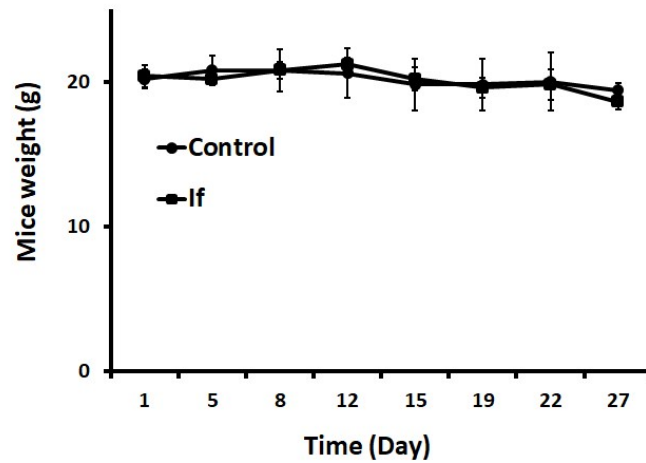

**B**

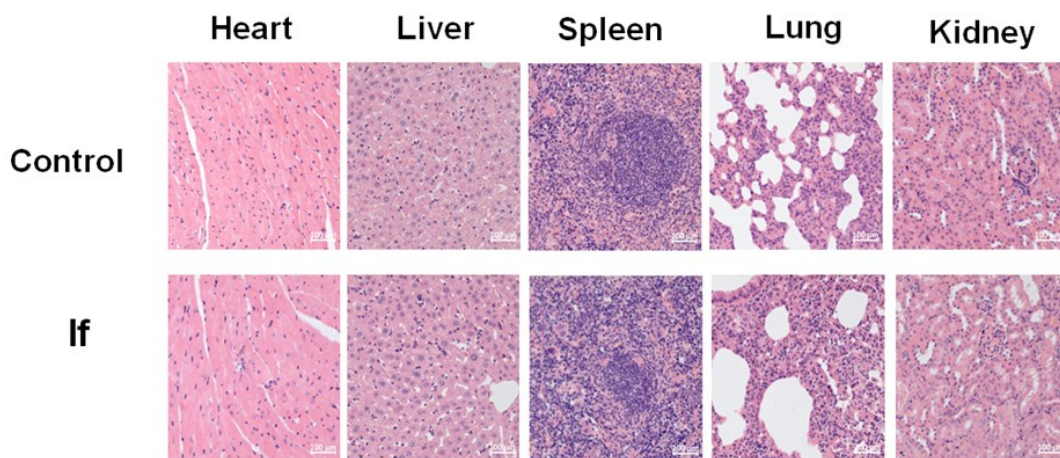

## General

All the terminal alkynes and chemical reagents were purchased from Adamas-beta, Energy Chemical, woka and TCI. Solvents were purchased from local supplier and used without further purification. All compounds were purified by performing flash chromatography on silica gel (200-300 mesh) or preparative thin-layer chromatography.  $^1\text{H}$  NMR and  $^{13}\text{C}$  NMR spectra were recorded on Agilent DD2 400-MR. The chemical shifts were recorded in parts per million (ppm) with tetramethylsilane as the internal reference. The microwave assisted reactions were performed on an Initiator EXP EU produced by Biotage. The ESI-MS was recorded on a Waters Acquity SQ Detector mass spectrometer or Finigan LCQ mass spectrometer. The high resolution of ESIMS was recorded on Bruker SolariX 7.0T mass spectrometer or IonSpec 4.7 Tesla Fourier Transform mass spectrometer. All MS analysis samples were prepared as solutions in methanol. Analytical HPLC runs were performed on Agilent Technologies 1260 Infinity connected with Inertsil® ODS-3 (Method 1) and Inertsil hypersil C8 (Method 2) by GL sciences Inc, with 1260 VWD VL, wavelength 282 nm. All the samples were dissolved in MeOH. The mobile phase was consisted of a gradient elution of MeOH and H<sub>2</sub>O (contain 0.1% triethylamine). Elution system was the mixture of MeOH/H<sub>2</sub>O from 10/90 to 90/10 in 20 min and then kept 90/10 in 20 min. The flow rate was 1.0 mL/min. Temperature was 30 °C. Compound **WMH-116** were synthesized following the reference of previous report.<sup>1</sup>

## Synthesis of compound I

### *Synthesis of compound I-2*

A mixture of compound **WMH-116** (384 mg, 1.0 mmol), p-toluenesulfonyl chloride (763 mg, 4.0 mmol), 4-dimethylaminopyridine (12.2 mg, 0.1 mmol) and triethylamine (505 mg, 5 mmol) were dissolved in 15 mL dichloromethane. After stirred at 25 °C for 6 hours, the reaction mixture was concentrated under reduced pressure and the crude residue was purified by flash chromatography on silica gel (petroleum ether: ethyl acetate, 2:1) to afford the corresponding product **I-2**.

**I-2**: 458 mg, 0.85 mmol, 85%, white solid. <sup>1</sup>H NMR (400 MHz, CDCl<sub>3</sub>): δ 7.78 (d, 2H, *J* = 8.4 Hz, phenyl-H), 7.54 (d, 2H, *J* = 8.0 Hz, phenyl-H), 7.32 (d, 2H, *J* = 8.0 Hz, phenyl-H), 7.25 (d, 2H, *J* = 8.0 Hz, phenyl-H), 7.03 (br s, 1H, -C(O)NH), 5.76 (br s, 1H, -C(O)NH), 5.64 (s, 2H, -OCH<sub>2</sub>N-), 4.15 (t, 2H, *J* = 4.4 Hz, -OCH<sub>2</sub>CH<sub>2</sub>O-), 3.88 (t, 2H, *J* = 4.4 Hz, -OCH<sub>2</sub>CH<sub>2</sub>O-), 2.66 (t, 2H, *J* = 7.6 Hz, phenyl-CH<sub>2</sub>-), 2.42 (s, 3H, -CH<sub>3</sub>), 1.65-1.61 (m, 2H, -CH<sub>2</sub>-), 1.33-1.28 (m, 8H, -(CH<sub>2</sub>)<sub>4</sub>-), 0.88 (t, 3H, *J* = 7.6 Hz, -CH<sub>3</sub>). <sup>13</sup>C NMR (100 MHz, CDCl<sub>3</sub>): δ 160.27, 156.20, 146.36, 145.03, 141.26, 132.59, 132.23, 129.88, 128.88, 127.91, 116.75, 99.12, 78.09, 73.53, 68.32, 67.90, 36.06, 31.75, 31.14, 29.18, 29.10, 22.63, 21.63, 14.08. IR: 2223 cm<sup>-1</sup> (-C≡C-). MS (ESI, m/z): 561.5 [M + Na]<sup>+</sup>, 1099.6 [2M + Na]<sup>+</sup>.

### *Synthesis of compound I-1*

To a solution of compound **I-2** (431 mg, 0.8 mmol) in 10 mL anhydrous acetone was added LiBr (695 mg, 8.0 mmol). Then the mixture was stirred and refluxed for 4 hours under nitrogen. After cooled to room temperature, the reaction mixture was concentrated under reduced pressure and the crude residue was purified by flash chromatography on silica gel (petroleum ether: ethyl acetate, 2:1) to afford the corresponding product **I-1**.

**I-1**: 343 mg, 0.77 mmol, 96%, white solid.  $^1\text{H}$  NMR (400 MHz,  $\text{CDCl}_3$ ):  $\delta$  7.54 (d, 2H,  $J = 5.2$  Hz, phenyl-H), 7.24 (d, 2H,  $J = 5.2$  Hz, phenyl-H), 7.04 (br s, 1H,  $-\text{C}(\text{O})\text{NH}$ ), 5.76 (br s, 1H,  $-\text{C}(\text{O})\text{NH}$ ), 5.74 (s, 2H,  $-\text{OCH}_2\text{N}$ -), 4.03 (t, 2H,  $J = 4.0$  Hz,  $-\text{OCH}_2\text{CH}_2\text{Br}$ ), 3.46 (t, 2H,  $J = 4.0$  Hz,  $-\text{OCH}_2\text{CH}_2\text{Br}$ ), 2.65 (t, 2H,  $J = 5.2$  Hz, phenyl- $\text{CH}_2$ -), 1.64-1.61 (m, 2H,  $-\text{CH}_2$ -), 1.32-1.27 (m, 8H,  $-(\text{CH}_2)_4$ -), 0.88 (t, 3H,  $J = 4.4$  Hz,  $-\text{CH}_3$ ).  $^{13}\text{C}$  NMR (100 MHz,  $\text{CDCl}_3$ ):  $\delta$  160.32, 156.15, 146.32, 141.32, 132.23, 128.85, 116.80, 99.13, 78.11, 73.58, 70.17, 36.05, 31.75, 31.11, 29.60, 29.17, 29.10, 22.63, 14.08. IR:  $2228\text{ cm}^{-1}$  ( $-\text{C}\equiv\text{C}$ -).

*General procedure for preparing I.*

Compound **I-1** (44.7 mg, 0.1 mmol) and various amines (1 mmol) were dissolved in 3 mL anhydrous DMF. After stirred at  $25\text{ }^\circ\text{C}$  for 12 hours, the reaction mixture was concentrated under reduced pressure and the crude residue was purified by preparative thin-layer chromatography to afford the corresponding product **I**.

**Ia**: 39.5 mg, 0.096 mmol, 96%, white solid. HPLC:  $t_{\text{R}} = 27.223$  min (Method 1, purity = 99.58%),  $t_{\text{R}} = 25.212$  min (Method 2, purity = 99.19%).  $^1\text{H}$  NMR (400 MHz,  $\text{DMSO}-d_6$ ):  $\delta$  8.02 (br s, 1H,  $-\text{C}(\text{O})\text{NH}$ ), 7.72 (br s, 1H,  $-\text{C}(\text{O})\text{NH}$ ), 7.63 (d, 2H,  $J = 7.6$  Hz, phenyl-H), 7.35 (d, 2H,  $J = 7.6$  Hz, phenyl-H), 5.71 (s, 2H,  $-\text{OCH}_2\text{N}$ -), 3.67 (t, 2H,  $J = 5.2$  Hz,  $-\text{OCH}_2\text{CH}_2\text{N}$ -), 2.63 (t, 2H,  $J = 7.6$  Hz, phenyl- $\text{CH}_2$ -), 2.41 (t, 2H,  $J = 5.2$  Hz,  $-\text{OCH}_2\text{CH}_2\text{N}$ -), 2.10 (s, 6H,  $-\text{N}(\text{CH}_3)_2$ ), 1.59-1.57 (m, 2H,  $-\text{CH}_2$ -), 1.27-1.24 (m, 8H,  $-(\text{CH}_2)_4$ -), 0.85 (t, 3H,  $J = 7.2$  Hz,  $-\text{CH}_3$ ).  $^{13}\text{C}$  NMR (100 MHz,  $\text{DMSO}-d_6$ ):  $\delta$  160.16, 157.25, 146.21, 140.51, 132.44, 129.46, 117.00, 97.75, 78.33, 74.95, 67.99, 58.20, 45.77, 35.54, 31.64, 31.01, 28.96, 28.90, 22.49, 14.37. IR:  $2227\text{ cm}^{-1}$  ( $-\text{C}\equiv\text{C}$ -). MS (ESI,  $m/z$ ): 412.5  $[\text{M} + \text{H}]^+$ , 823.8  $[2\text{M} + \text{H}]^+$ .



HRMS: calcd for  $C_{23}H_{34}N_5O_2$ ,  $[M + H]^+$ , 412.2707, found 412.2713.

**Ib**: 36.9 mg, 0.084 mmol, 84%, white solid. HPLC:  $t_R = 30.306$  min (Method 1, purity = 99.77%),  $t_R = 26.612$  min (Method 2, purity = 99.25%).  $^1H$  NMR (400 MHz, DMSO- $d_6$ ):  $\delta$  8.04 (br s, 1H, -C(O)NH), 7.74 (br s, 1H, -C(O)NH), 7.63 (d, 2H,  $J = 8.4$  Hz, phenyl-H), 7.35 (d, 2H,  $J = 8.4$  Hz, phenyl-H), 5.72 (s, 2H, -OCH<sub>2</sub>N-), 3.66 (t, 2H,  $J = 6.0$  Hz, -OCH<sub>2</sub>CH<sub>2</sub>N-), 2.64 (t, 2H,  $J = 7.6$  Hz, phenyl-CH<sub>2</sub>-), 2.57 (t, 2H,  $J = 5.6$  Hz, -OCH<sub>2</sub>CH<sub>2</sub>N-), 2.44 (q, 4H,  $J = 6.8$  Hz, -(CH<sub>2</sub>)<sub>2</sub>), 1.59-1.56 (m, 2H, -CH<sub>2</sub>-), 1.27-1.24 (m, 8H, -(CH<sub>2</sub>)<sub>4</sub>), 0.89-0.83 (m, 9H, -CH<sub>3</sub> + -(CH<sub>3</sub>)<sub>2</sub>).  $^{13}C$  NMR (100 MHz, DMSO- $d_6$ ):  $\delta$  160.16, 157.22, 146.20, 140.49, 132.43, 129.45, 117.01, 97.77, 78.51, 74.98, 68.49, 51.93, 47.23, 35.53, 31.66, 31.03, 28.95, 28.92, 22.50, 14.38, 12.00. IR: 2227  $cm^{-1}$  (-C $\equiv$ C-). MS (ESI, m/z): 440.42  $[M + H]^+$ . HRMS: calcd for  $C_{25}H_{36}N_5O_2$ ,  $[M + H]^+$ , 440.3020, found 440.3016.

**Ic**: 38.9 mg, 0.089 mmol, 89%, white solid. HPLC:  $t_R = 29.924$  min (Method 1, purity = 98.84%),  $t_R = 26.178$  min (Method 2, purity = 97.75%).  $^1H$  NMR (400 MHz, DMSO- $d_6$ ):  $\delta$  8.04 (br s, 1H, -C(O)NH), 7.74 (br s, 1H, -C(O)NH), 7.64 (d, 2H,  $J = 8.0$  Hz, phenyl-H), 7.35 (d, 2H,  $J = 8.0$  Hz, phenyl-H), 5.72 (s, 2H, -OCH<sub>2</sub>N-), 3.69 (t, 2H,  $J = 6.4$  Hz, -OCH<sub>2</sub>CH<sub>2</sub>N-), 2.64 (t, 2H,  $J = 7.6$  Hz, phenyl-CH<sub>2</sub>-), 2.58 (t, 2H,  $J = 6.4$  Hz, -OCH<sub>2</sub>CH<sub>2</sub>N-), 2.51-2.41 (m, 4H, pyrrolidinyl-H), 1.64-1.59 (m, 6H, pyrrolidinyl-H + -CH<sub>2</sub>-), 1.27-1.24 (m, 8H, -(CH<sub>2</sub>)<sub>4</sub>-), 0.85 (t, 3H,  $J = 7.2$  Hz, -CH<sub>3</sub>).  $^{13}C$  NMR (100 MHz, DMSO- $d_6$ ):  $\delta$  160.17, 157.22, 146.20, 140.51, 132.45, 129.45, 117.00, 97.77, 78.37, 74.97, 68.91, 54.81, 54.25, 35.53, 31.66, 31.04, 28.95, 28.93, 23.47, 22.50, 14.38. IR: 2227  $cm^{-1}$  (-C $\equiv$ C-). MS (ESI, m/z): 438.5  $[M + H]^+$ , 875.8  $[2M + H]^+$ . HRMS: calcd for  $C_{25}H_{36}N_5O_2$ ,  $[M + H]^+$ , 438.2863, found 438.2869.

**Id:** 41.1 mg, 0.091 mmol, 91%, white solid. HPLC:  $t_R = 31.320$  min (Method 1, purity = 99.82%);  $t_R = 26.679$  min (Method 2, purity = 99.20%).  $^1\text{H}$  NMR (400 MHz,  $\text{DMSO-}d_6$ ):  $\delta$  8.04 (br s, 1H,  $-\text{C}(\text{O})\text{NH}$ ), 7.74 (br s, 1H,  $-\text{C}(\text{O})\text{NH}$ ), 7.64 (d, 2H,  $J = 8.0$  Hz, phenyl-H), 7.35 (d, 2H,  $J = 8.0$  Hz, phenyl-H), 5.71 (s, 2H,  $-\text{OCH}_2\text{N-}$ ), 3.68 (t, 2H,  $J = 5.6$  Hz,  $-\text{OCH}_2\text{CH}_2\text{N-}$ ), 2.64 (t, 2H,  $J = 7.6$  Hz, phenyl- $\text{CH}_2-$ ), 2.42 (t, 2H,  $J = 5.6$  Hz,  $-\text{OCH}_2\text{CH}_2\text{N-}$ ), 2.33-2.25 (m, 4H, piperidyl-H), 1.61-1.56 (m, 2H,  $-\text{CH}_2-$ ), 1.41-1.37 (m, 4H, piperidyl-H), 1.28-1.24 (m, 10H, piperidyl-H +  $-(\text{CH}_2)_4-$ ), 0.85 (t, 3H,  $J = 7.2$  Hz,  $-\text{CH}_3$ ).  $^{13}\text{C}$  NMR (100 MHz,  $\text{DMSO-}d_6$ ):  $\delta$  160.18, 157.18, 146.20, 140.49, 132.44, 129.46, 117.01, 97.76, 78.42, 74.99, 67.77, 57.86, 54.66, 35.52, 31.66, 31.04, 28.93, 25.90, 24.28, 22.50, 14.38. IR: 2227  $\text{cm}^{-1}$  ( $-\text{C}\equiv\text{C-}$ ). MS (ESI,  $m/z$ ): 452.5  $[\text{M} + \text{H}]^+$ , 903.8  $[2\text{M} + \text{H}]^+$ . HRMS: calcd for  $\text{C}_{26}\text{H}_{38}\text{N}_5\text{O}_2$ ,  $[\text{M} + \text{H}]^+$ , 452.3020, found 452.3026.

**Ie:** 42.3 mg, 0.088 mmol, 88%, white solid. HPLC:  $t_R = 27.928$  min (Method 1, purity = 99.30%),  $t_R = 25.226$  min (Method 2, purity = 98.18%).  $^1\text{H}$  NMR (400 MHz,  $\text{DMSO-}d_6$ ):  $\delta$  8.04 (br s, 1H,  $-\text{C}(\text{O})\text{NH}$ ), 7.74 (br s, 1H,  $-\text{C}(\text{O})\text{NH}$ ), 7.64 (d, 2H,  $J = 8.0$  Hz, phenyl-H), 7.35 (d, 2H,  $J = 8.0$  Hz, phenyl-H), 5.71 (s, 2H,  $-\text{OCH}_2\text{N-}$ ), 3.68 (t, 2H,  $J = 5.6$  Hz,  $-\text{OCH}_2\text{CH}_2\text{N-}$ ), 2.64 (t, 2H,  $J = 7.6$  Hz, phenyl- $\text{CH}_2-$ ), 2.45 (t, 2H,  $J = 5.6$  Hz,  $-\text{OCH}_2\text{CH}_2\text{N-}$ ), 2.34-2.20 (m, 10H, piperazinyl-H +  $-\text{CH}_2-$ ), 1.61-1.56 (m, 2H,  $-\text{CH}_2-$ ), 1.27-1.25 (m, 8H,  $-(\text{CH}_2)_4-$ ), 0.93 (t, 3H,  $J = 7.2$  Hz,  $-\text{CH}_3$ ), 0.85 (t, 3H,  $J = 7.2$  Hz,  $-\text{CH}_3$ ).  $^{13}\text{C}$  NMR (100 MHz,  $\text{DMSO-}d_6$ ):  $\delta$  160.18, 157.18, 146.20, 140.48, 132.46, 129.45, 117.01, 97.78, 78.44, 74.99, 67.73, 57.18, 53.46, 52.72, 52.00, 35.54, 31.65, 31.05, 28.95, 28.93, 22.51, 14.38, 12.40. IR: 2224  $\text{cm}^{-1}$  ( $-\text{C}\equiv\text{C-}$ ). MS (ESI,  $m/z$ ): 481.5  $[\text{M} + \text{H}]^+$ , 961.9  $[2\text{M} + \text{H}]^+$ . HRMS: calcd for  $\text{C}_{27}\text{H}_{41}\text{N}_6\text{O}_2$ ,  $[\text{M} + \text{H}]^+$ , 481.3285, found 481.3292.

**If:** 44.5 mg, 0.085 mmol, 85%, white solid. HPLC:  $t_R = 28.686$  min (Method 1, purity = 97.82%);  $t_R = 24.935$  min (Method 2, purity = 95.97%).  $^1\text{H}$  NMR (400 MHz,  $\text{DMSO-}d_6$ ):  $\delta$  8.06 (br s, 1H,  $-\text{C}(\text{O})\text{NH}$ ), 7.75 (br s, 1H,  $-\text{C}(\text{O})\text{NH}$ ), 7.64 (d, 2H,  $J = 8.0$  Hz, phenyl-H), 7.35 (d, 2H,  $J = 8.0$  Hz, phenyl-H), 5.71 (s, 2H,  $-\text{OCH}_2\text{N-}$ ), 3.68 (t, 2H,  $J = 5.6$  Hz,  $-\text{OCH}_2\text{CH}_2\text{N-}$ ), 2.64 (t, 2H,  $J = 7.6$  Hz, phenyl- $\text{CH}_2-$ ), 2.44 (t, 2H,  $J = 5.6$  Hz,  $-\text{OCH}_2\text{CH}_2\text{N-}$ ), 2.38-2.23 (m, 12H, piperazinyl-H +  $-\text{CH}_2\text{CH}_2-$ ), 2.09 (s, 6H,  $-\text{N}(\text{CH}_3)_2$ ), 1.61-1.56 (m, 2H,  $-\text{CH}_2-$ ), 1.27-1.23 (m, 8H,  $-(\text{CH}_2)_4-$ ), 0.85 (t, 3H,  $J = 7.2$  Hz,  $-\text{CH}_3$ ).  $^{13}\text{C}$  NMR (100 MHz,  $\text{DMSO-}d_6$ ):  $\delta$  160.17, 157.17, 146.19, 140.47, 132.47, 129.45, 117.01, 97.77, 78.43, 75.00, 67.69, 57.17, 57.01, 56.36, 53.47, 45.98, 35.55, 31.66, 31.07, 28.98, 28.93, 22.52, 14.40. IR:  $2225\text{ cm}^{-1}$  ( $-\text{C}\equiv\text{C-}$ ). MS (ESI,  $m/z$ ): 524.6  $[\text{M} + \text{H}]^+$ . HRMS: calcd for  $\text{C}_{29}\text{H}_{46}\text{N}_7\text{O}_2$ ,  $[\text{M} + \text{H}]^+$ , 524.3707, found 524.3714.

## Cell culture

Human liver cancer HepG2 cell, human prostate cancer PC-3 and ovarian cancer SKOV3 cells were purchased from Cell Resource Centre, IBMS, CAMS/PUMC. Human pancreatic cancer Panc-1 cells were the gifts from Prof. Huaizhi Wang (Institute of Hepatopancreatobiliary Surgery, Southwest Hospital, Chongqing). HepG2 cells were grown in Dulbecco's modified eagle's medium (DMEM) (HyClone) supplemented with 10% fetal bovine serum (FBS). Panc-1 and BxPC-3 cells were grown in Roswell Park Memorial Institute 1640 (RPMI 1640) (GIBCO) supplemented with 10% FBS. PC-3 cells were grown in Ham's F12 (Kaighn's modification) (GIBCO) supplemented with 10% FBS. SKOV3 cells were grown in McCoy's 5A (GIBCO) supplemented with 10% FBS. All cells were

incubated at a humidified atmosphere containing 5% CO<sub>2</sub> at 37 °C.

### **Reagents and Antibodies**

MTT (3-(4,5-dimethylthiazol-2-yl)-2,5-diphenyl tetrazolium bromide) was purchased from Adamas. The annexin V-FITC/ Propidium Iodide PI apoptosis detection kit was purchased from Sangon Biotech (Shanghai, China). The primary antibodies including PARP antibody, Bcl-2 antibody, HSF1 rabbit mAb, HSP70 rat mAb, HSP27 rabbit mAb, eIF4E rabbit mAb and LC3B rabbit mAb were all obtained from Cell Signaling Technology (Danvers, MA, USA). The  $\beta$ -actin rabbit antibody and goat anti-rat (HRP) secondary antibody were purchased from Bioss (Beijing, China). The goat anti-rabbit (HRP) secondary antibody was purchased from Sino Biological Inc. (Beijing, China). The cell lysis buffer, primary antibody dilution buffer, ECL kit and cycloheximide were purchased from Beyotime (Shanghai, China). Necrostatin-1 was purchased from Selleckchem.

### **Cell growth inhibition assay**

HepG2, PC-3 and SKOV3 cells were seeded into a 96-well plate at 10000 cells per well, while BxPC-3 and Panc-1 at 5000 cells per well, and allowed to adhere overnight. Then the culture medium was removed and replaced with fresh media alone as control or containing various concentrations of the compounds. After indicated treatment, the number of viable cells remained was determined by MTT colorimetric assay. The absorbance was measured in a BioTek® SynergyH4 hybrid reader at a wavelength of 490 nm. All experiments were done in triplicate and repeated three independent times. The IC<sub>50</sub> values were calculated with the software program SPSS 22.0.

### **Visualization of cell morphology via microscopy**

Panc-1 cells were seeded in 60 mm culture dishes at a density of  $2.5 \times 10^5$  cells and allowed to adhere overnight. Then the culture medium was removed and replaced with fresh media alone as control or containing 5  $\mu$ M of **If**. After indicated treatment, the cells were washed with PBS and observed under the microscope (Olympus IX51).

### **In vivo study in mice model**

BALB/c female nude mice (5 weeks) were purchased from the Shanghai Xipur-Bikai Experimental Animal Ltd (Shanghai, China). All animal experimental procedures were done in accordance with protocols approved by the Institutional Animal Care and Use Committee (IACUC) of China Pharmaceutical University. Experimental Animals housed under sterile conditions as per standard protocols. The nude mice were injected with  $1 \times 10^7$  Panc-1 cells suspensions in the right flank region, Cells suspensions were prepared in 0.1 mL of PBS and combined with 50% Matrigel (BD Biosciences, San Diego, CA, USA). When tumors reached approximately 100 mm<sup>3</sup>, tumor-bearing mice were randomly divided into 3 groups (n = 5/group).

Animals in the treated group received an intraperitoneal (i.p.) injection of **If** dissolved in sterile PBS containing 1% DMSO at 20 mg/kg body weight twice a week. And the blank control group received vehicle. The tumor volume and body weight were monitored before every administration, and the tumor volume was calculated using the following standard formula:  $\text{width}^2 \times \text{length} \times 0.5$ , where the length and the width represent the maximum and

the minimum diameters, respectively. After about 4 weeks, mice were euthanized by cervical dislocation. Tumor samples and organs were excised and fixed in 4% polyformaldehyde for histopathology analyses.

#### *HE Staining*

Briefly, after deparaffinization and rehydration with xylene and an ethanol gradient, 4 µm longitudinal sections were stained with hematoxylin solution for 5 min. Then the sections were stained with eosin solution for 5 min and followed by dehydration with graded alcohol and clearing in xylene. The mounted slides were then examined and photographed using a fluorescence microscope (Zeiss Axio Vert A1).

#### *Ki67 staining*

The 5 µm longitudinal sections were deparaffinised and rehydrated using xylene and an ethanol gradient. Endogenous peroxidase activity was blocked by incubation with 3% hydrogen peroxide in methanol for 30 min. After sealing with serum, the sections were incubated with the primary antibody Ki67 (Wuhan servicebio technology CO., Ltd, Wuhan, China) overnight at 4 °C. The next day, the slides were rinsed and incubated with the corresponding secondary antibody (Wuhan servicebio technology CO., Ltd, Wuhan, China) for 50 min. After washed with PBS, the sections were stained by diaminobenzidine (DAB) and counterstained with hematoxylin, respectively. Finally, the specimens were dehydrated and photographed under the microscope (Zeiss Axio Vert A1).

### *Terminal deoxynucleotidyl transferase-mediated dUTP nick end labeling (TUNEL) assay*

Paraffin blocks were cut into slices with 4  $\mu\text{m}$  thickness. The TUNEL assay was conducted using a TUNEL apoptosis detection kit (Wuhan servicebio technology CO., Ltd, Wuhan, China). Paraffin sections were incubated with proteinase K at 37 °C for 30 min. Endogenous peroxidase activity was blocked by incubation with 3% hydrogen peroxide in methanol for 30 min. The sections were incubated with TUNEL reaction mixture at 37 °C for 2 h. Finally, the sections were counterstained with DAPI for 10 min, and the images were captured under the microscope (Zeiss Axio Vert A1).

### **Apoptosis and necrosis assay on flow cytometry**

The cancer cells were seeded in 6-well plates ( $2.5 \times 10^5$  cells/well) and allowed to adhere and proliferate overnight. Culture medium was then removed and fresh media containing the compound was added. After 48 hours treatment, the cells were harvested and washed with cold PBS. The samples were pelleted again through centrifugation and resuspended in binding buffer. Annexin-V/FITC and propidium iodide (PI) was then added to the cells and the samples were incubated for 15 minutes at room temperature. After staining, flow cytometry was performed on Fluorescence Activated Cell Sorting (Beckman Coulter, CytoFLEX model). Each sample was performed in triplicate.

### **Western Blotting**

The cancer cells after being treated by the compounds for 48 h were lysed in lysis buffer. A total of 10-50  $\mu\text{g}$  protein were quantified and loaded into the 10% SDS-PAGE gel.

After electrophoresis (BIO-RAD), the proteins in the gel were transferred to a PVDF membrane. Then the membrane was blocked in 5% (w/v) skim milk in TBS-T for 1 h and incubated with the primary antibodies at 4 °C overnight. The membrane was washed with TBS-T and incubated with HRP-conjugated secondary antibody for 1 h. Specific proteins were detected using an ECL kit.

### **Immunofluorescence assay**

Panc-1 cells were seeded at 100000 cells per well in RPMI 1640 with 10% FBS on cover glass in 6-well plates. After 24 h, cells were treated with the compounds for 12 h. Cells were washed with 1× PBS and fixed in a solution (4% paraformaldehyde in PBS) at room temperature for 15 minutes. After that, cells were blocked with permeable buffer (0.5% Triton-100 in PBS) for 20 minutes and added with goat serum at room temperature for 1 hour, then incubated with LC3B (1:150) antibody at 4 °C overnight. Next, cells were washed with PBS and incubated with Alexa Fluor 488 secondary antibodies (1:250) in the dark for 1 hour and the nuclei were stained with Hoechst 33342 (10 µg/mL) for 10 minutes. Each group of Panc-1 cells were observed using inverted fluorescence microscope (Leica DMI8).

### **Reference**

1. Zhu, R.; Wang, M.; Xia, Y.; Qu, F.; Neyts, J.; Peng, L. Arylethynyltriazole acyclonucleosides inhibit hepatitis C virus replication. *Bioorg. Med. Chem. Lett.* **2008**, *18*, 3321-3327.



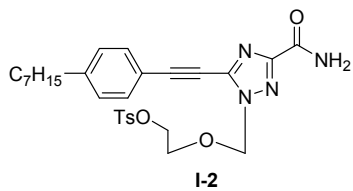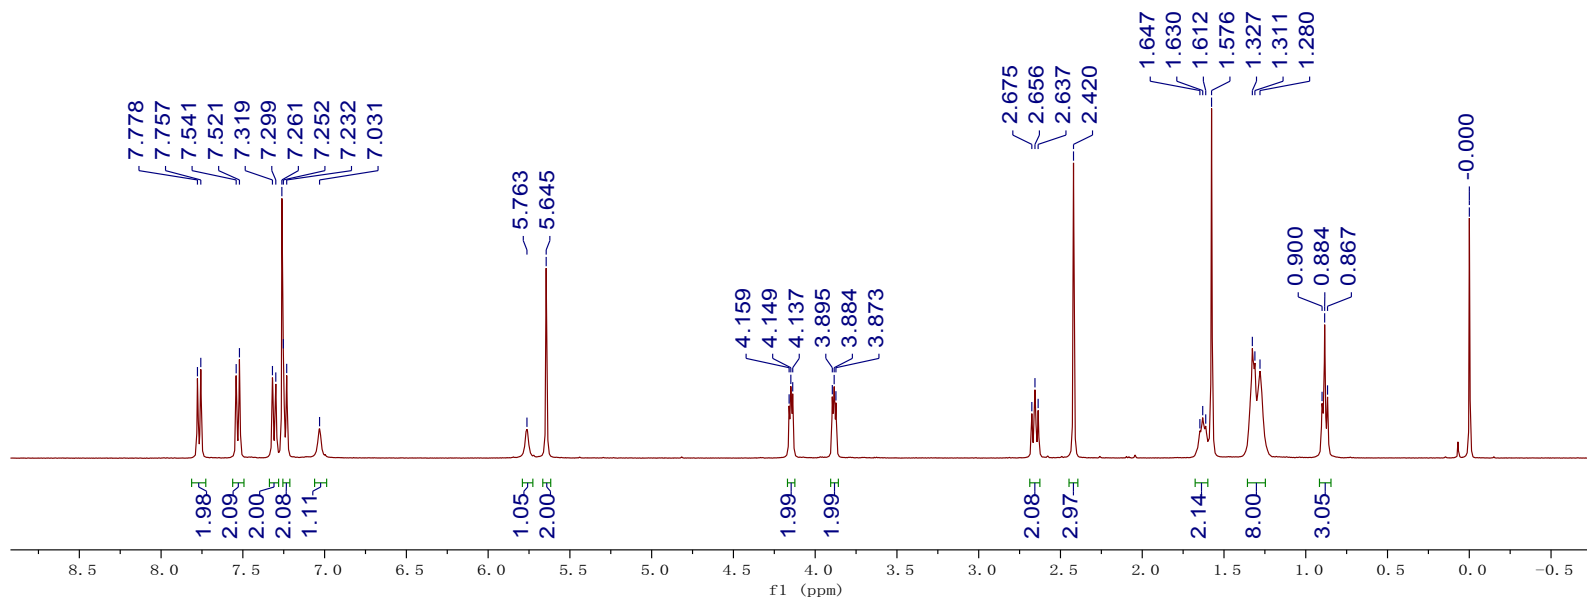

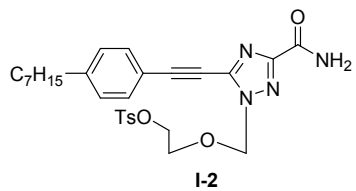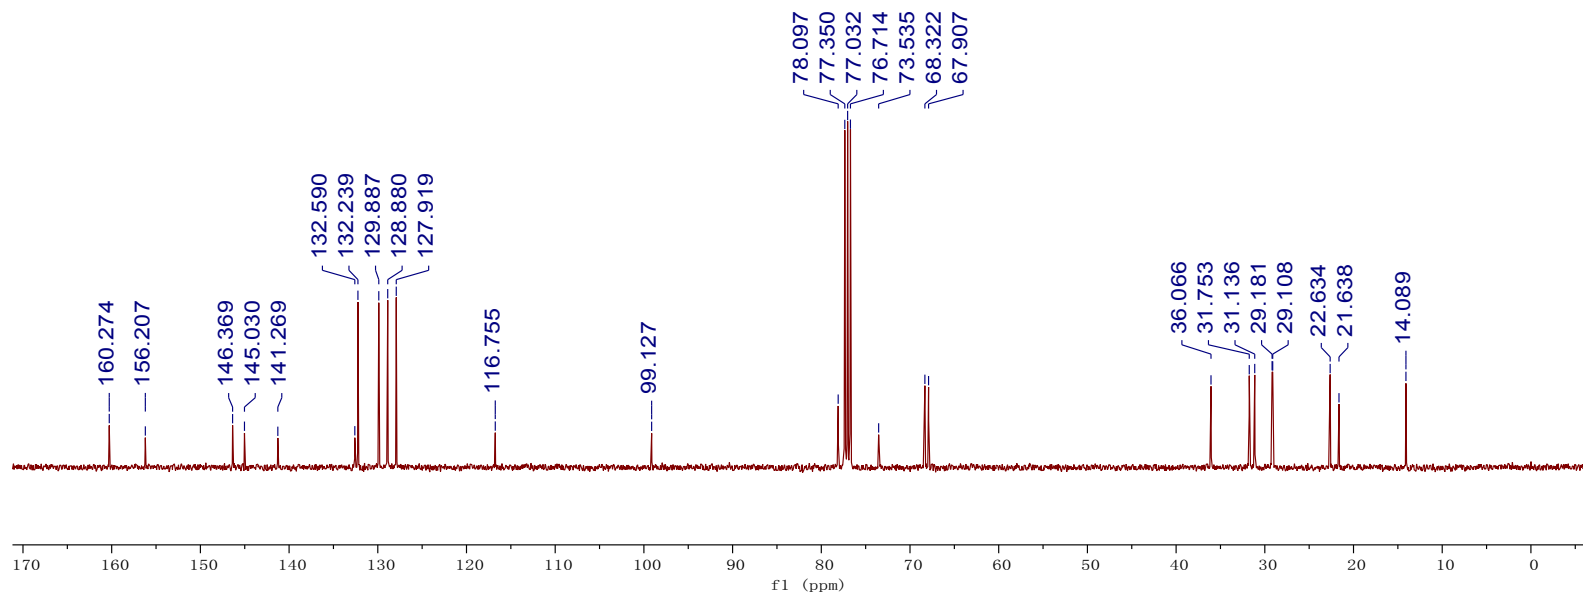

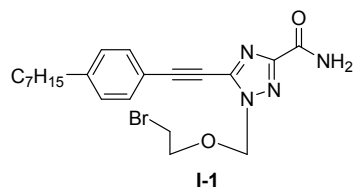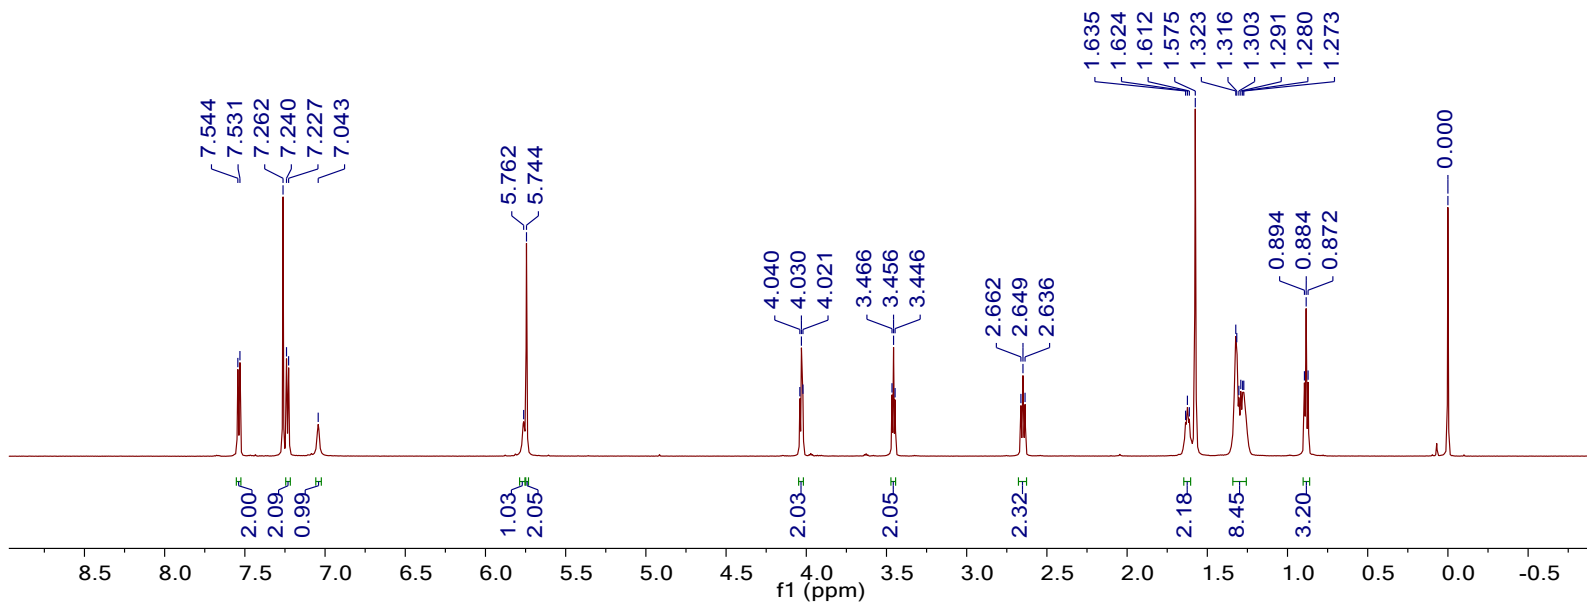

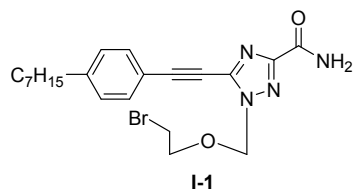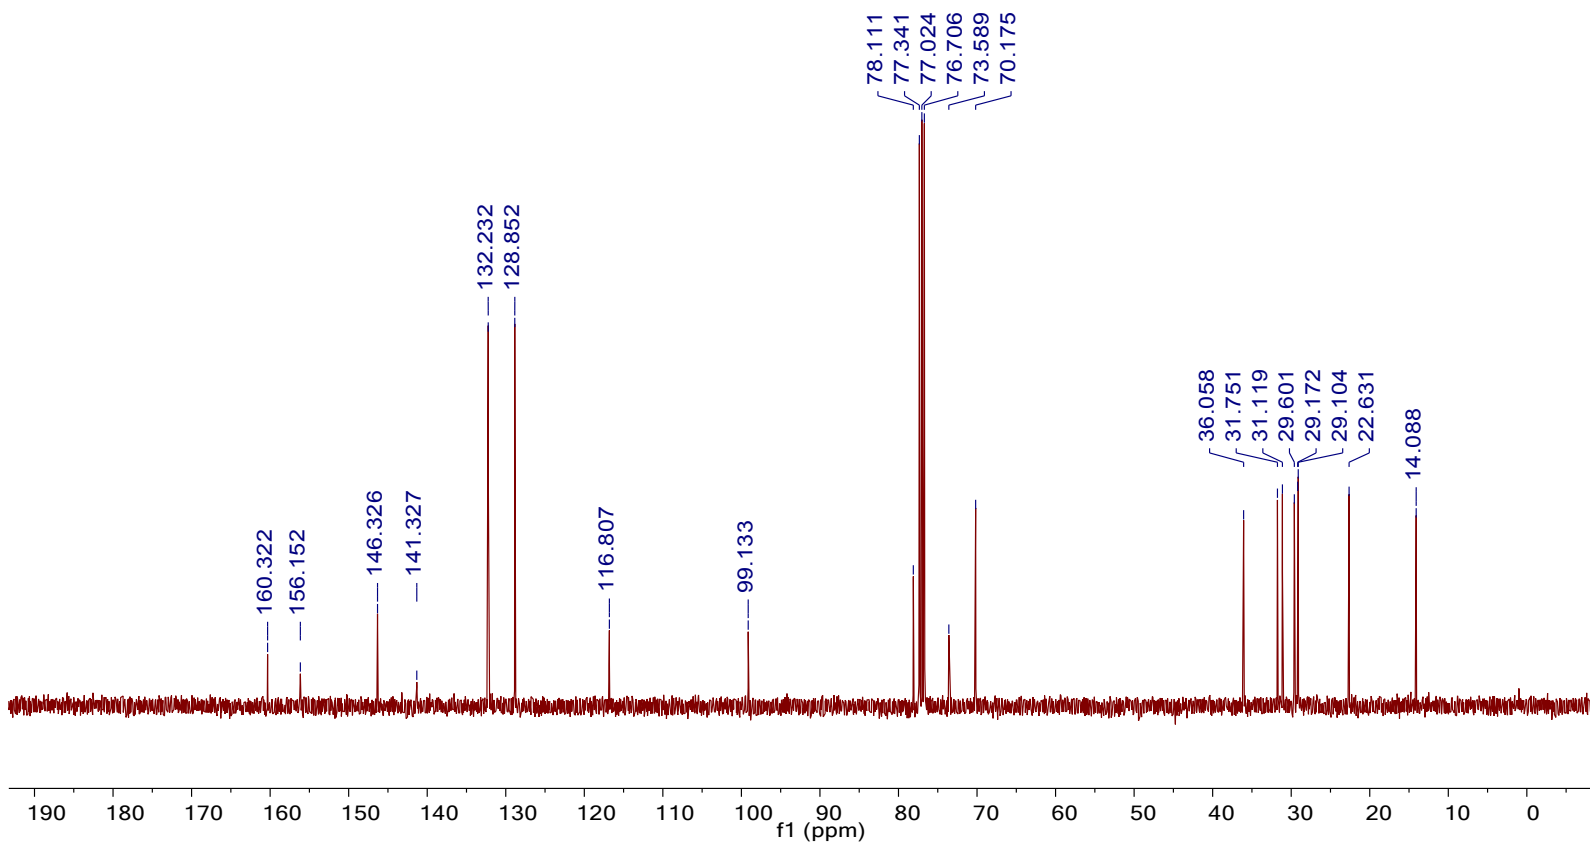

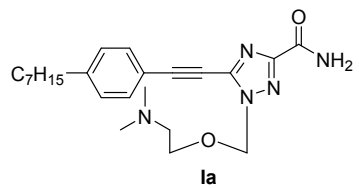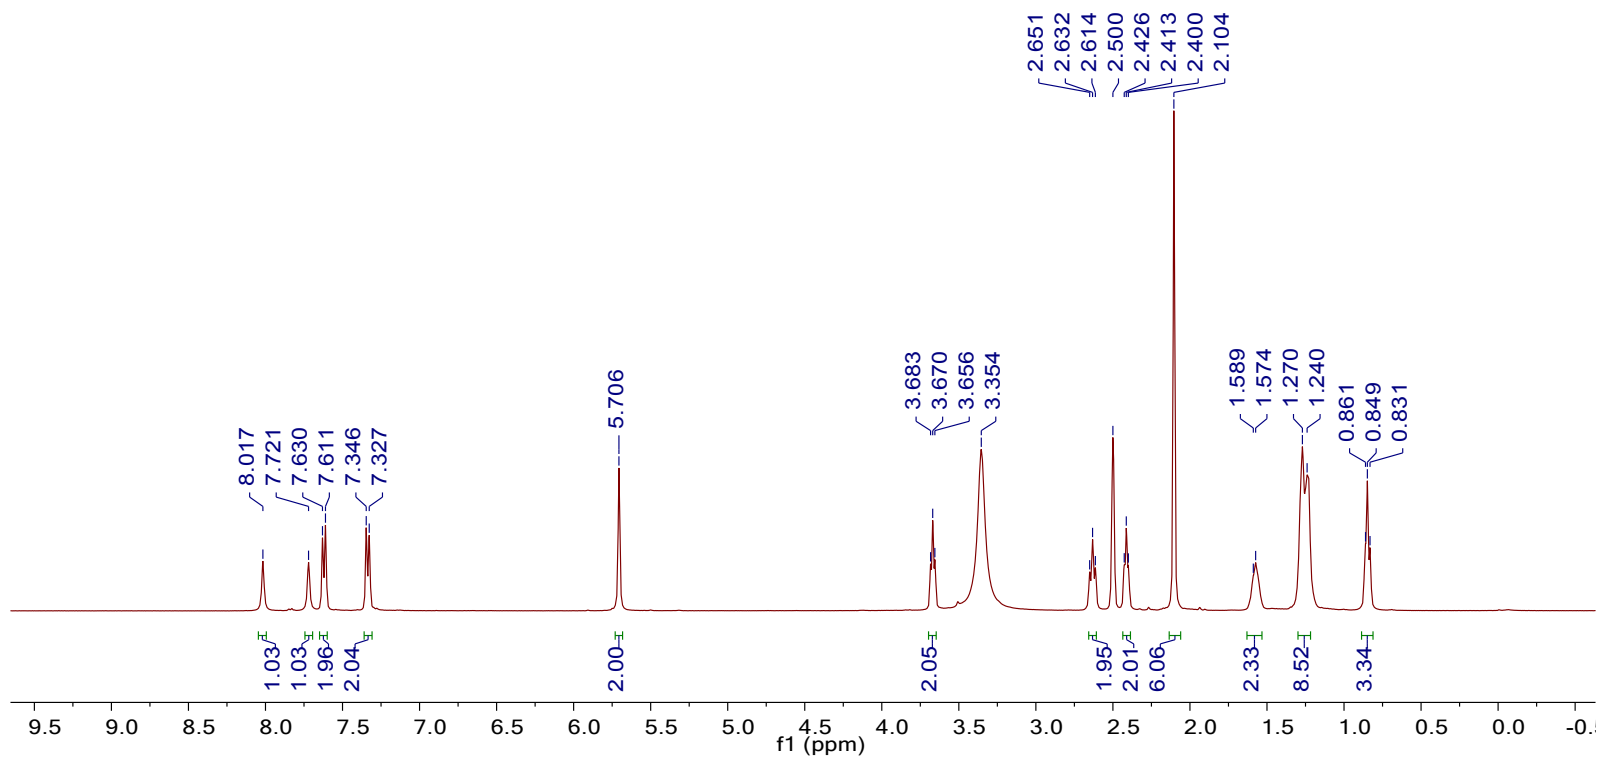

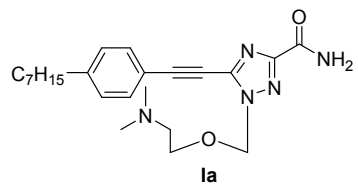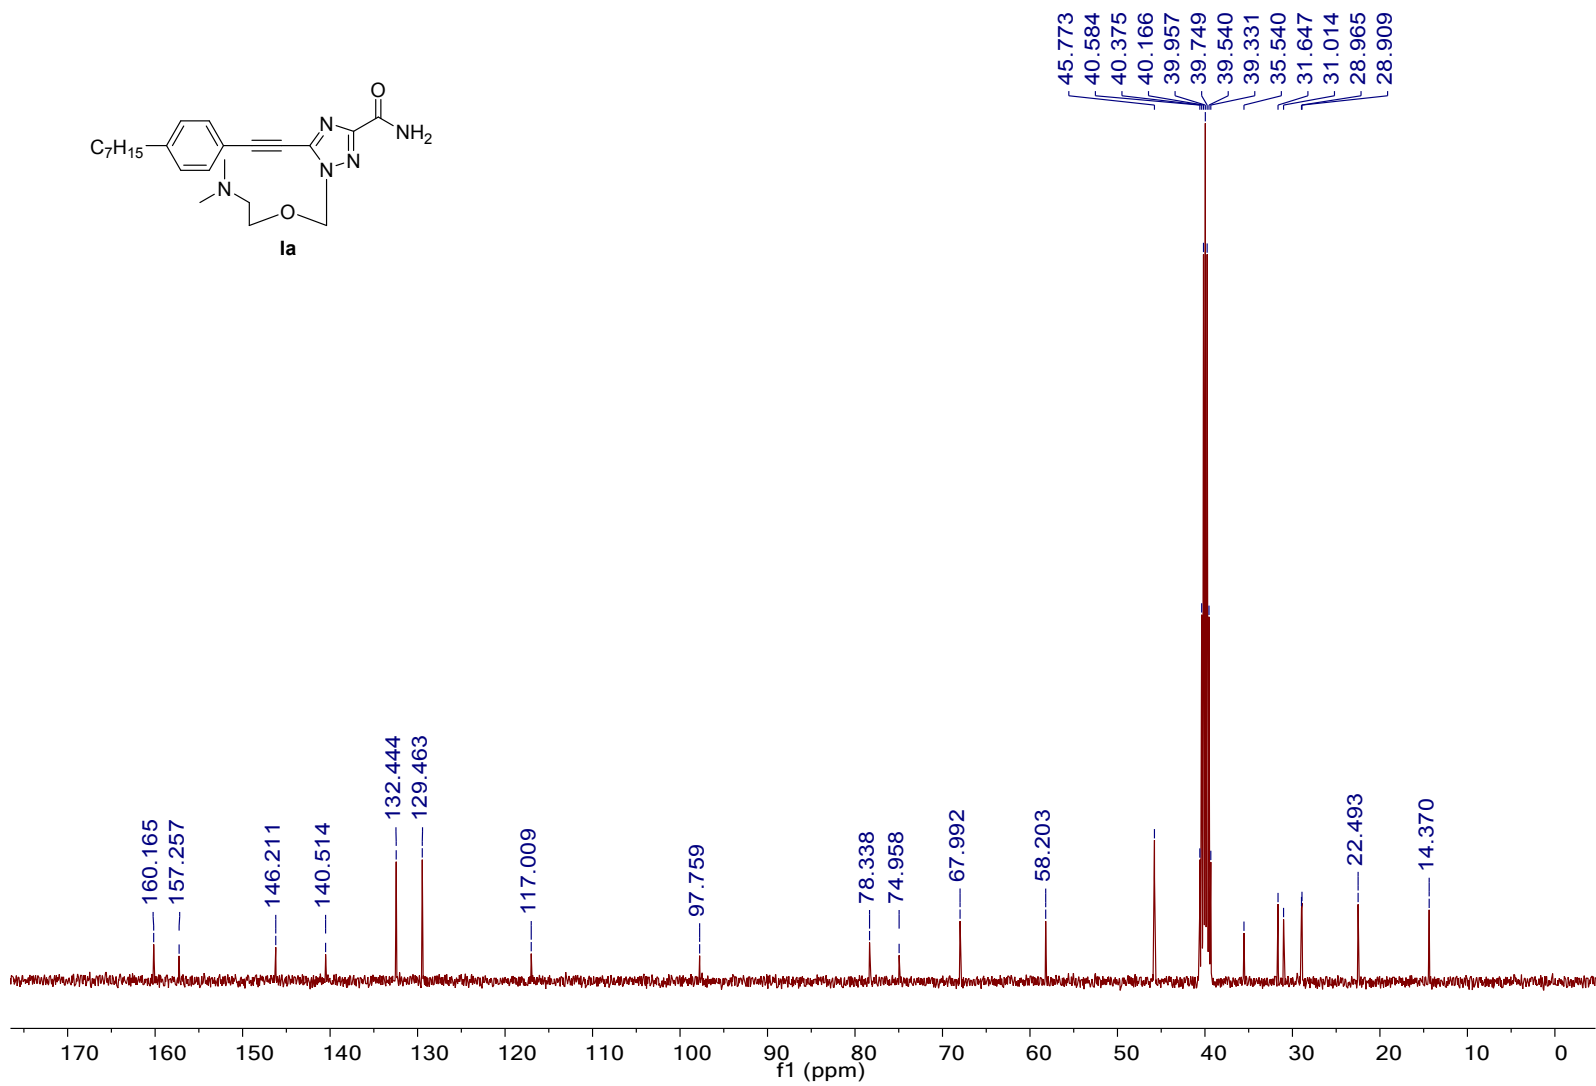

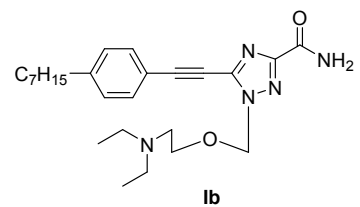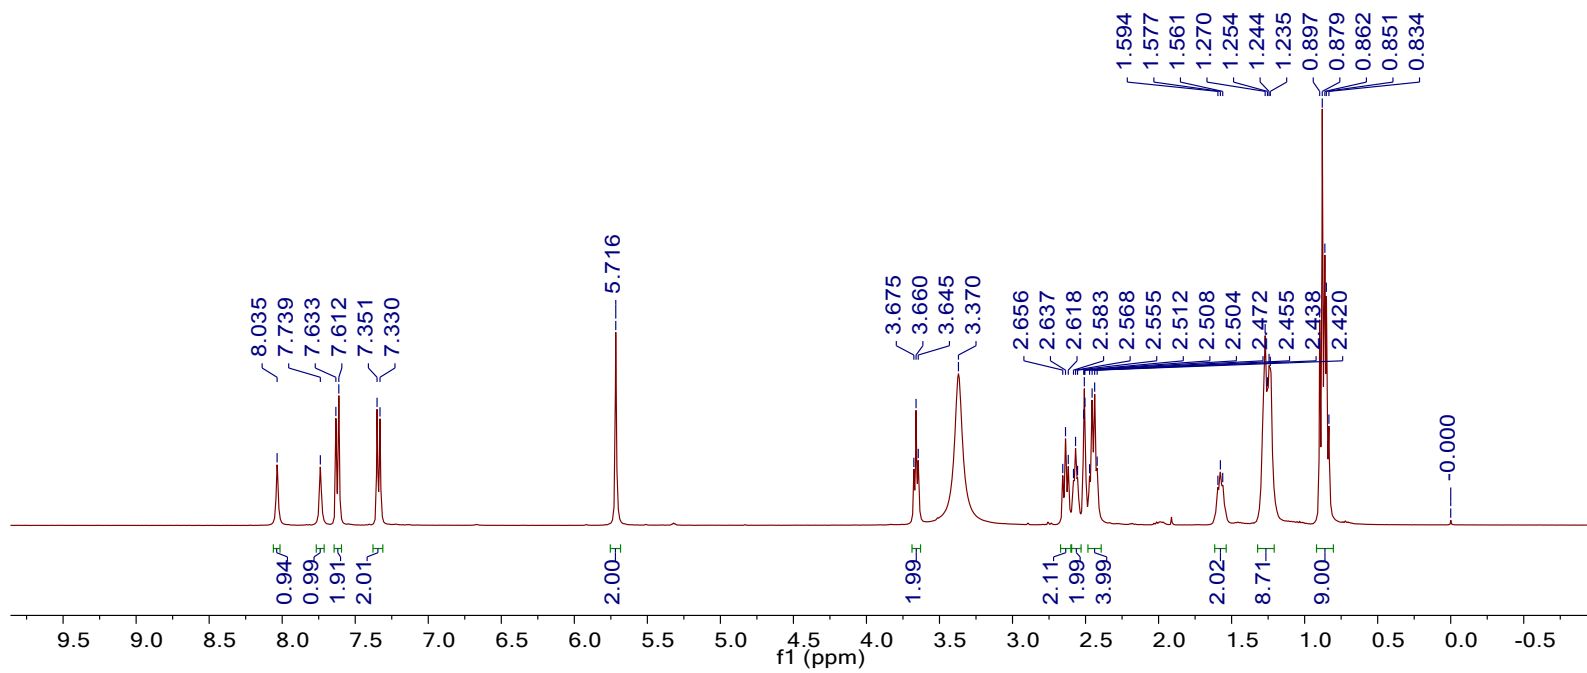

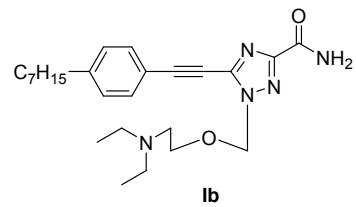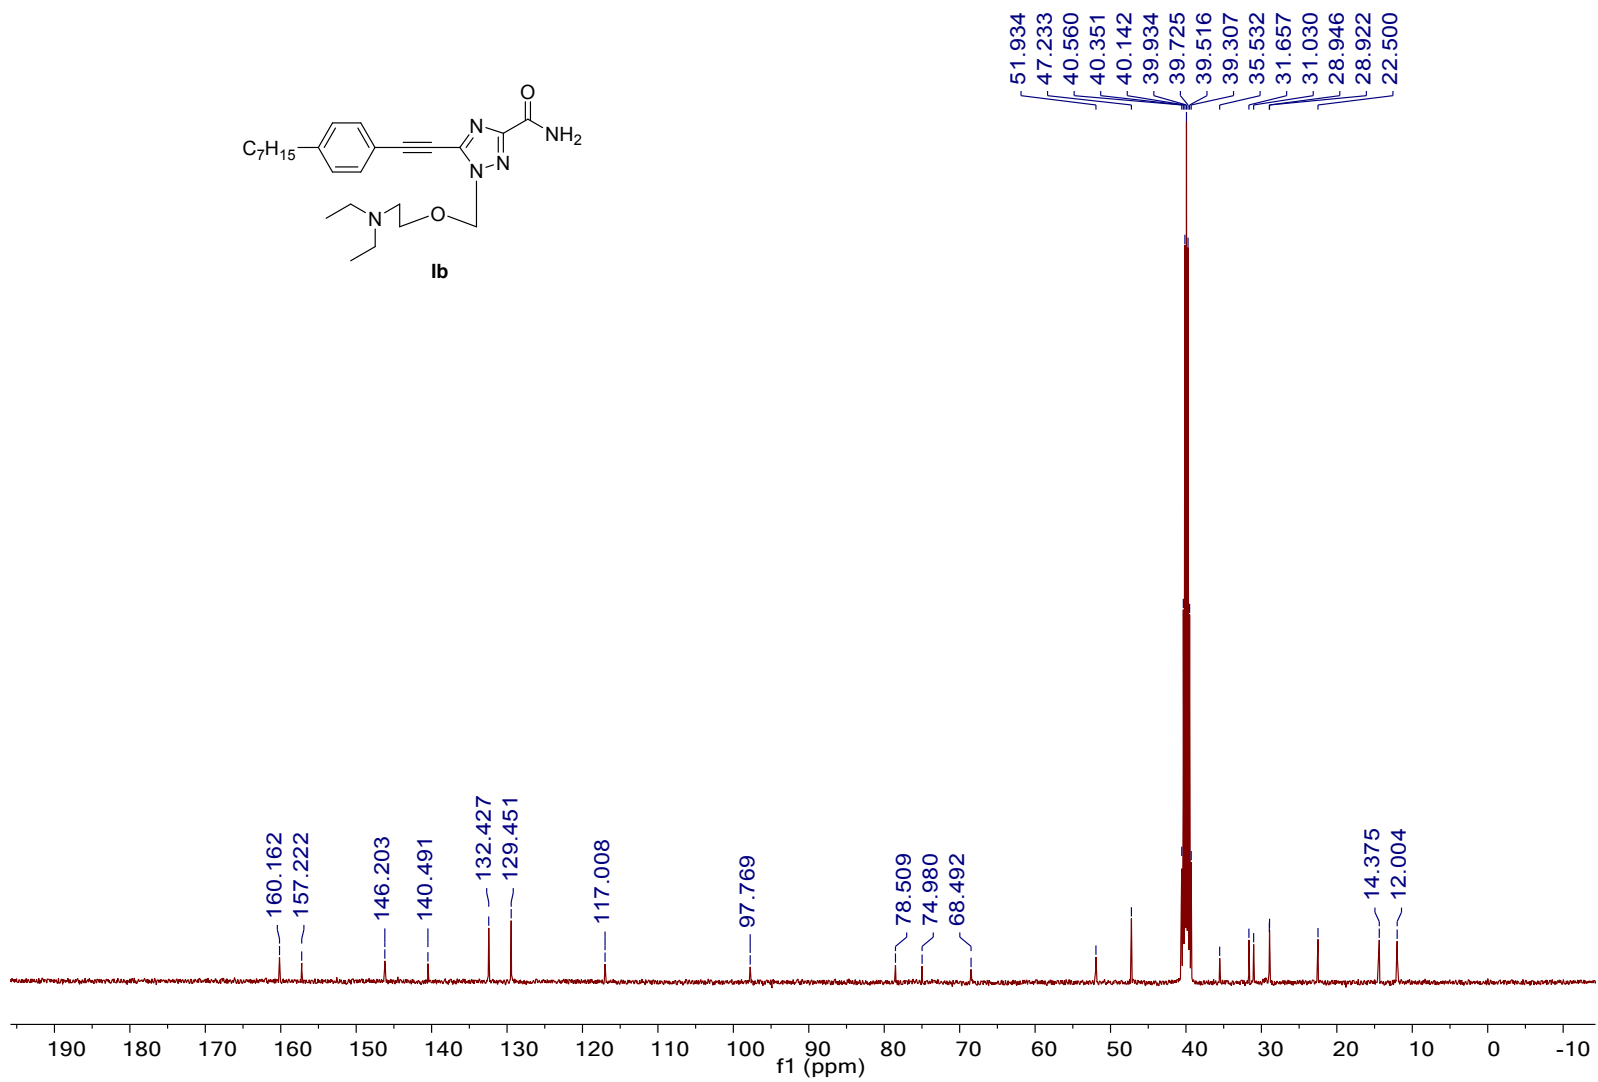



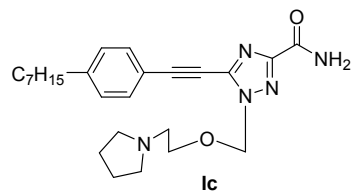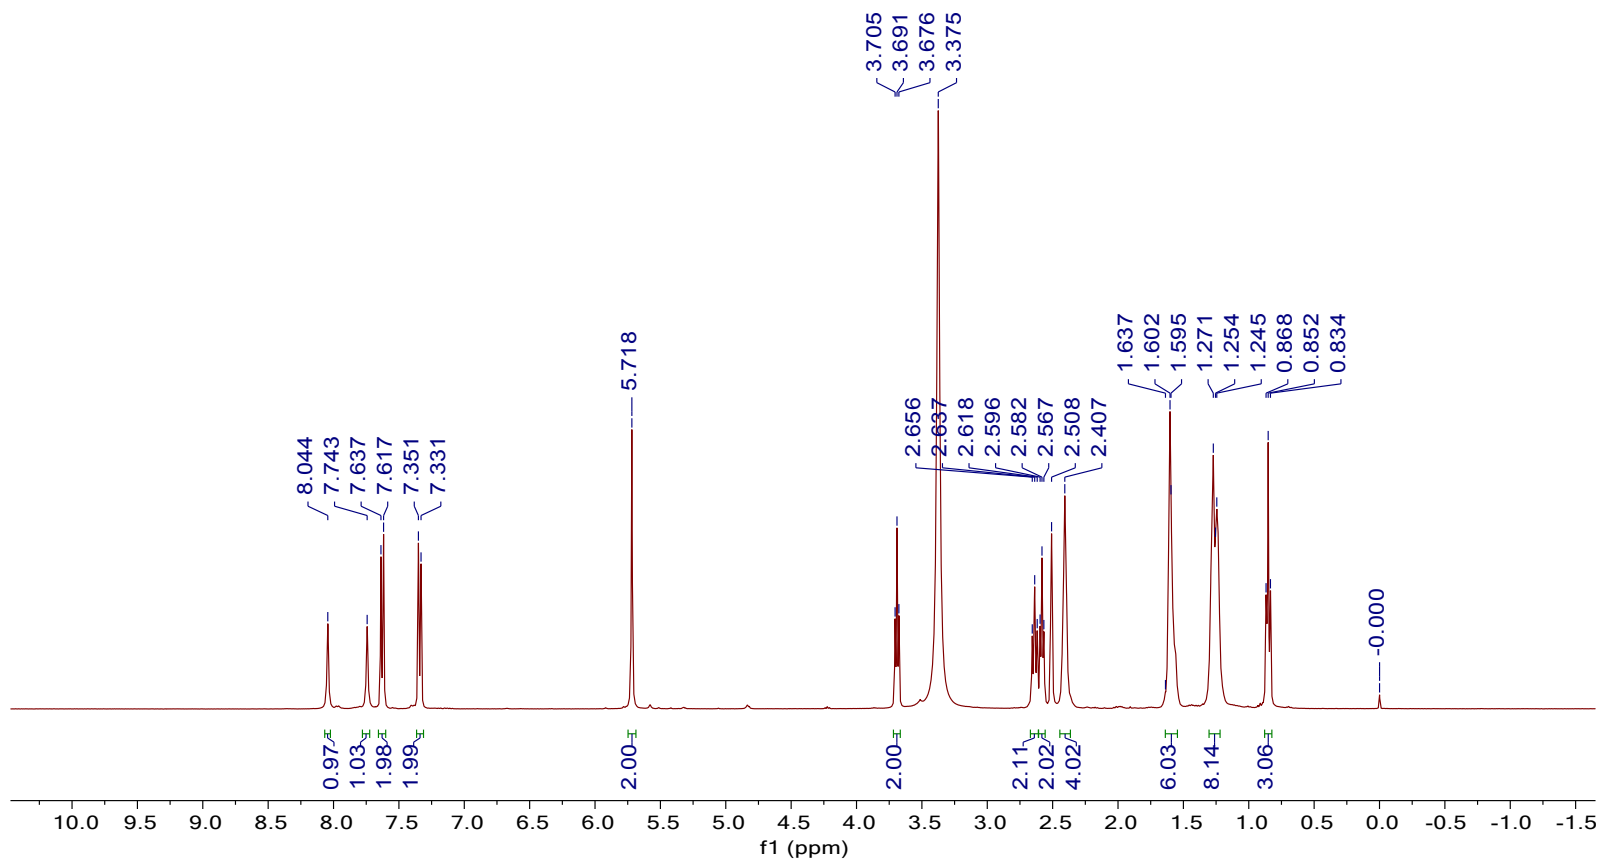

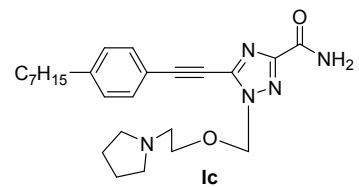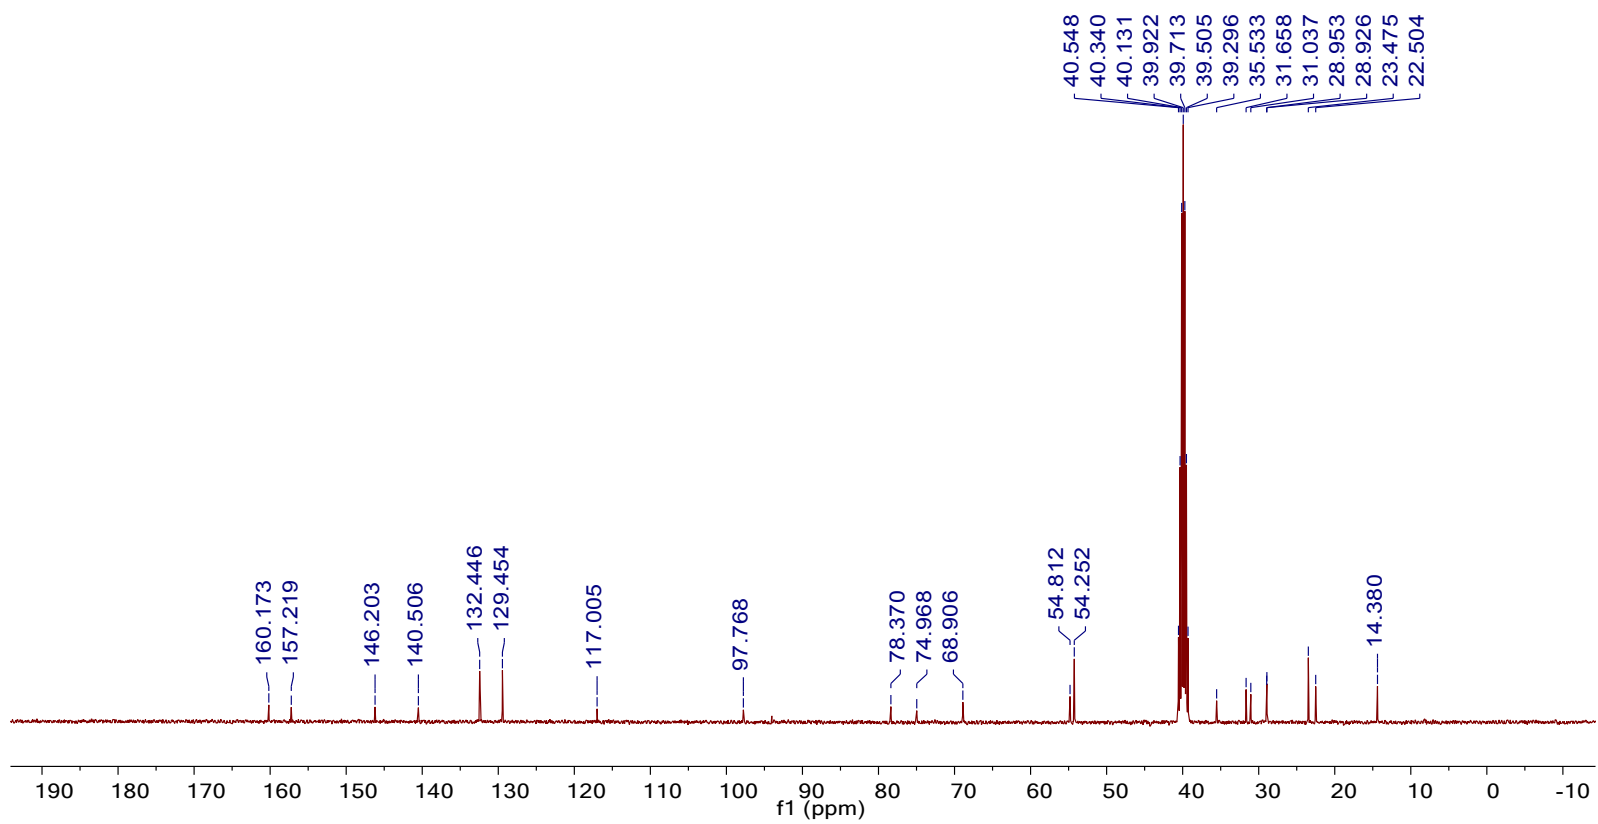

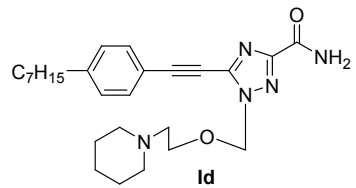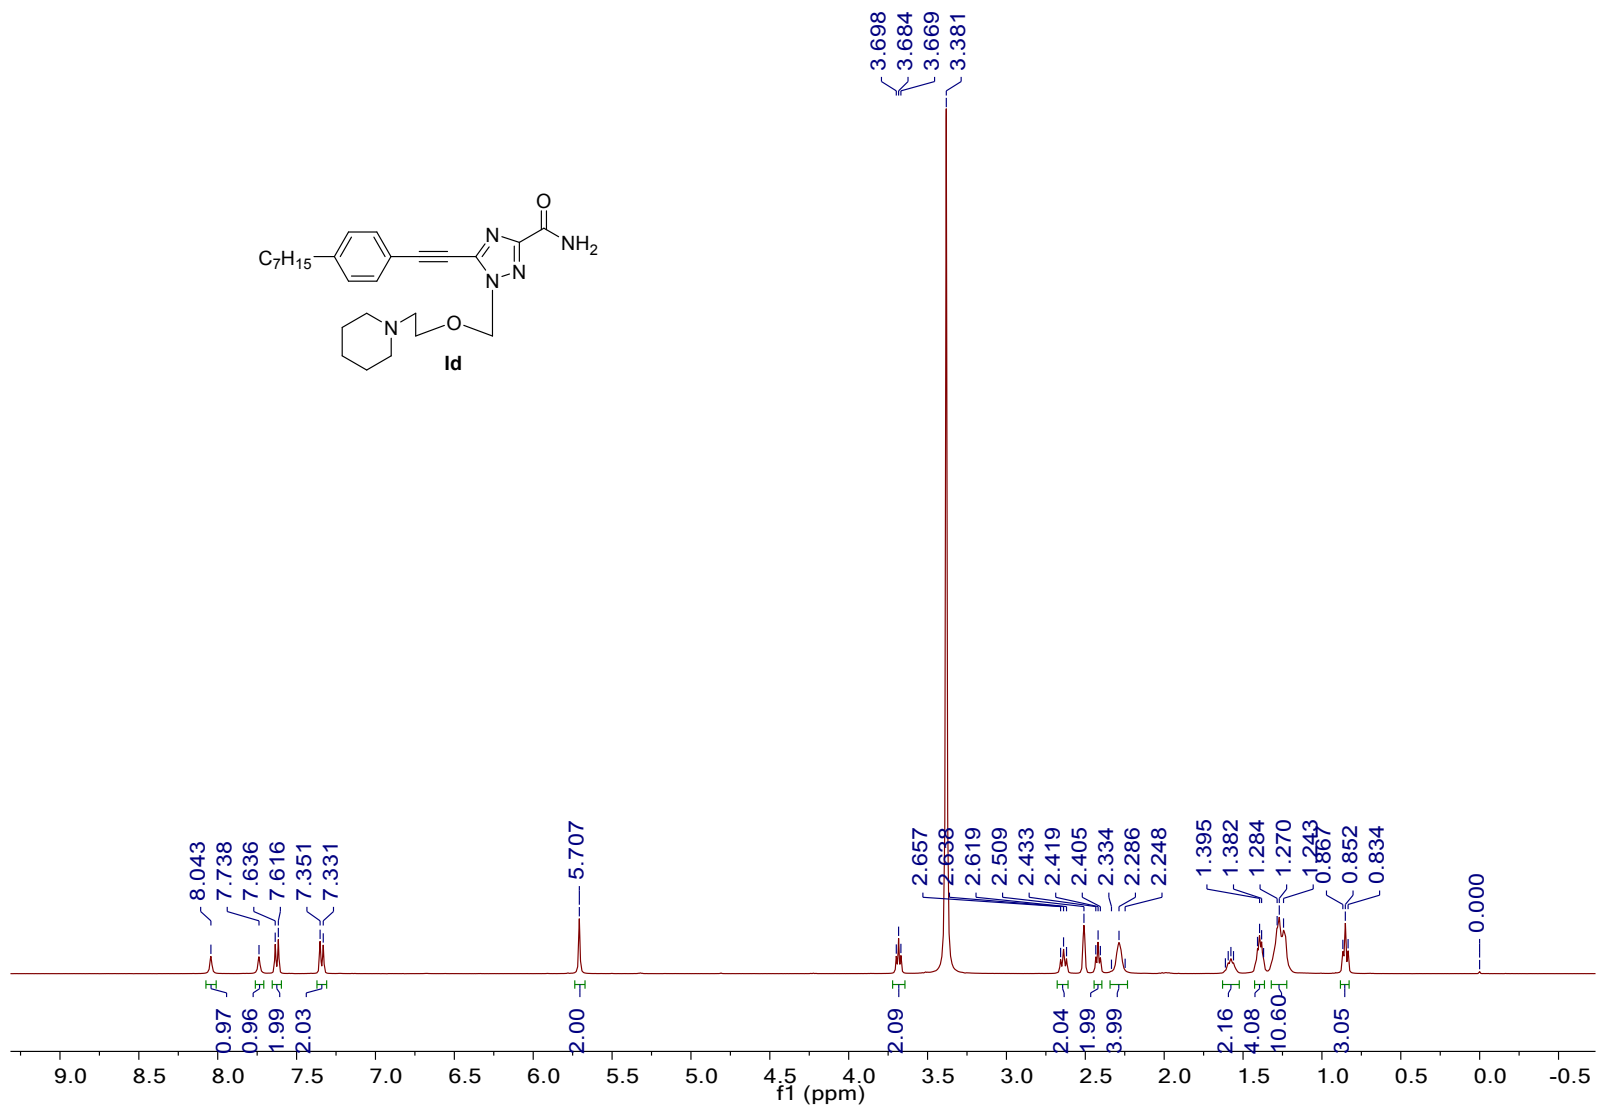

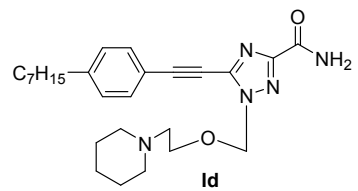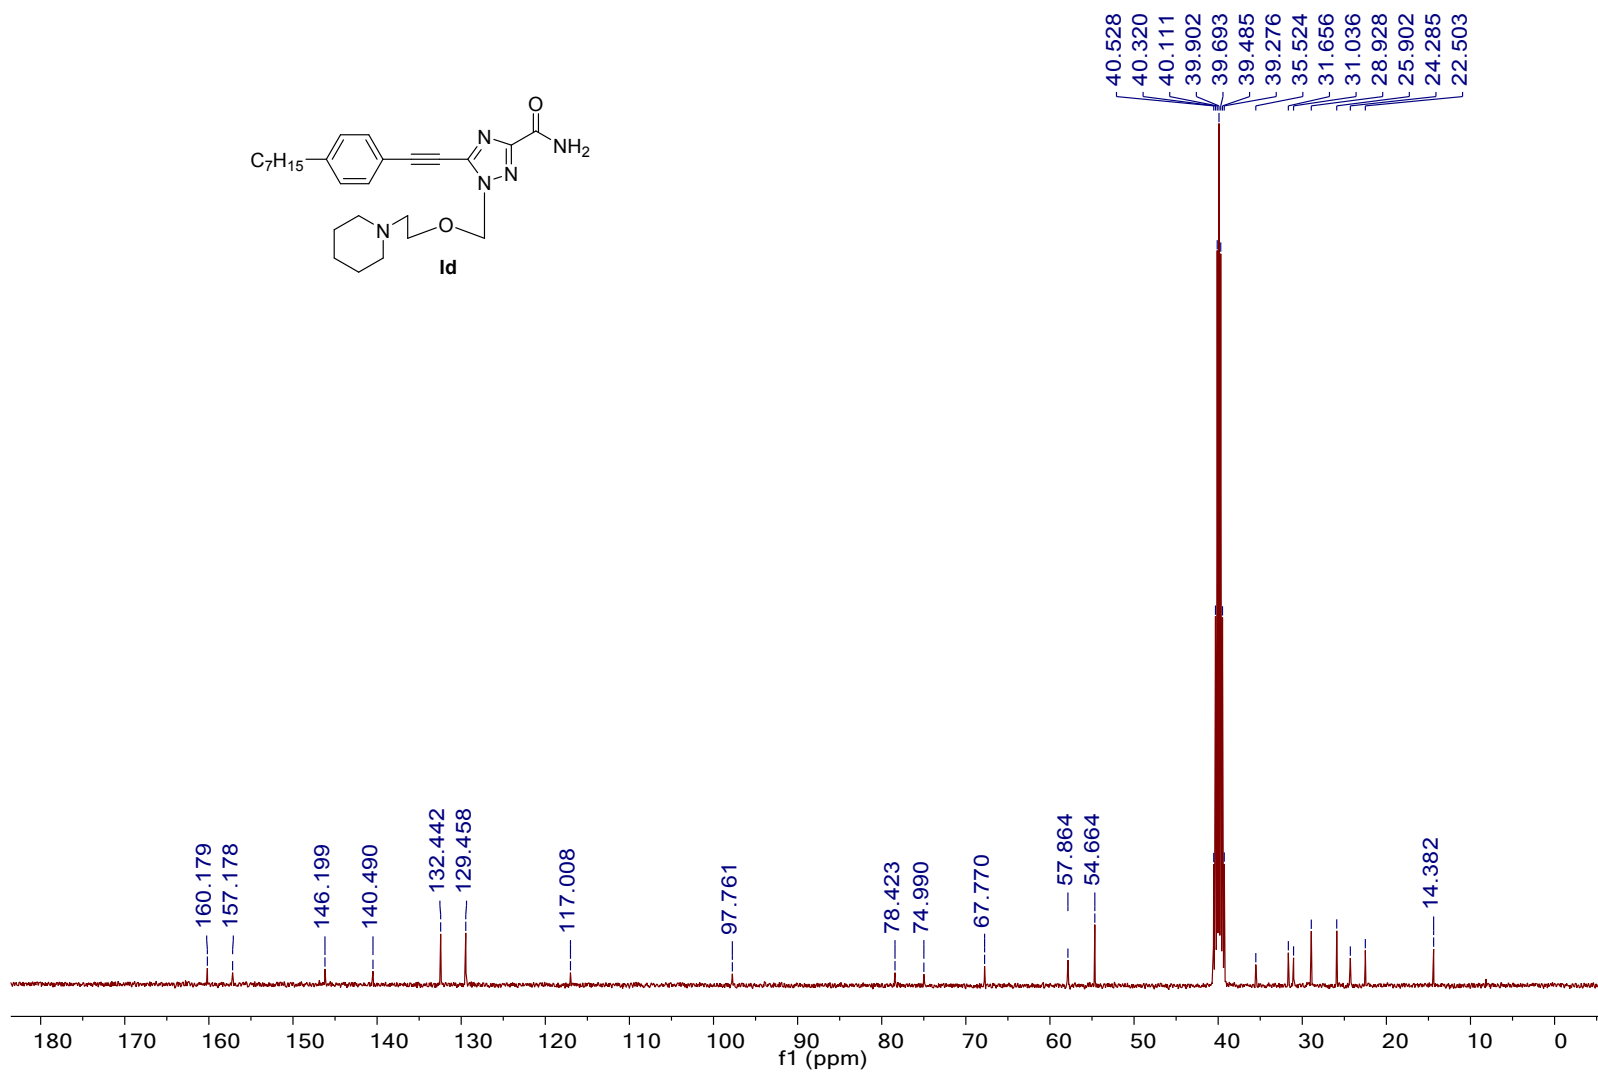

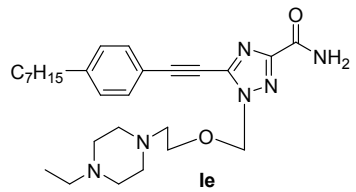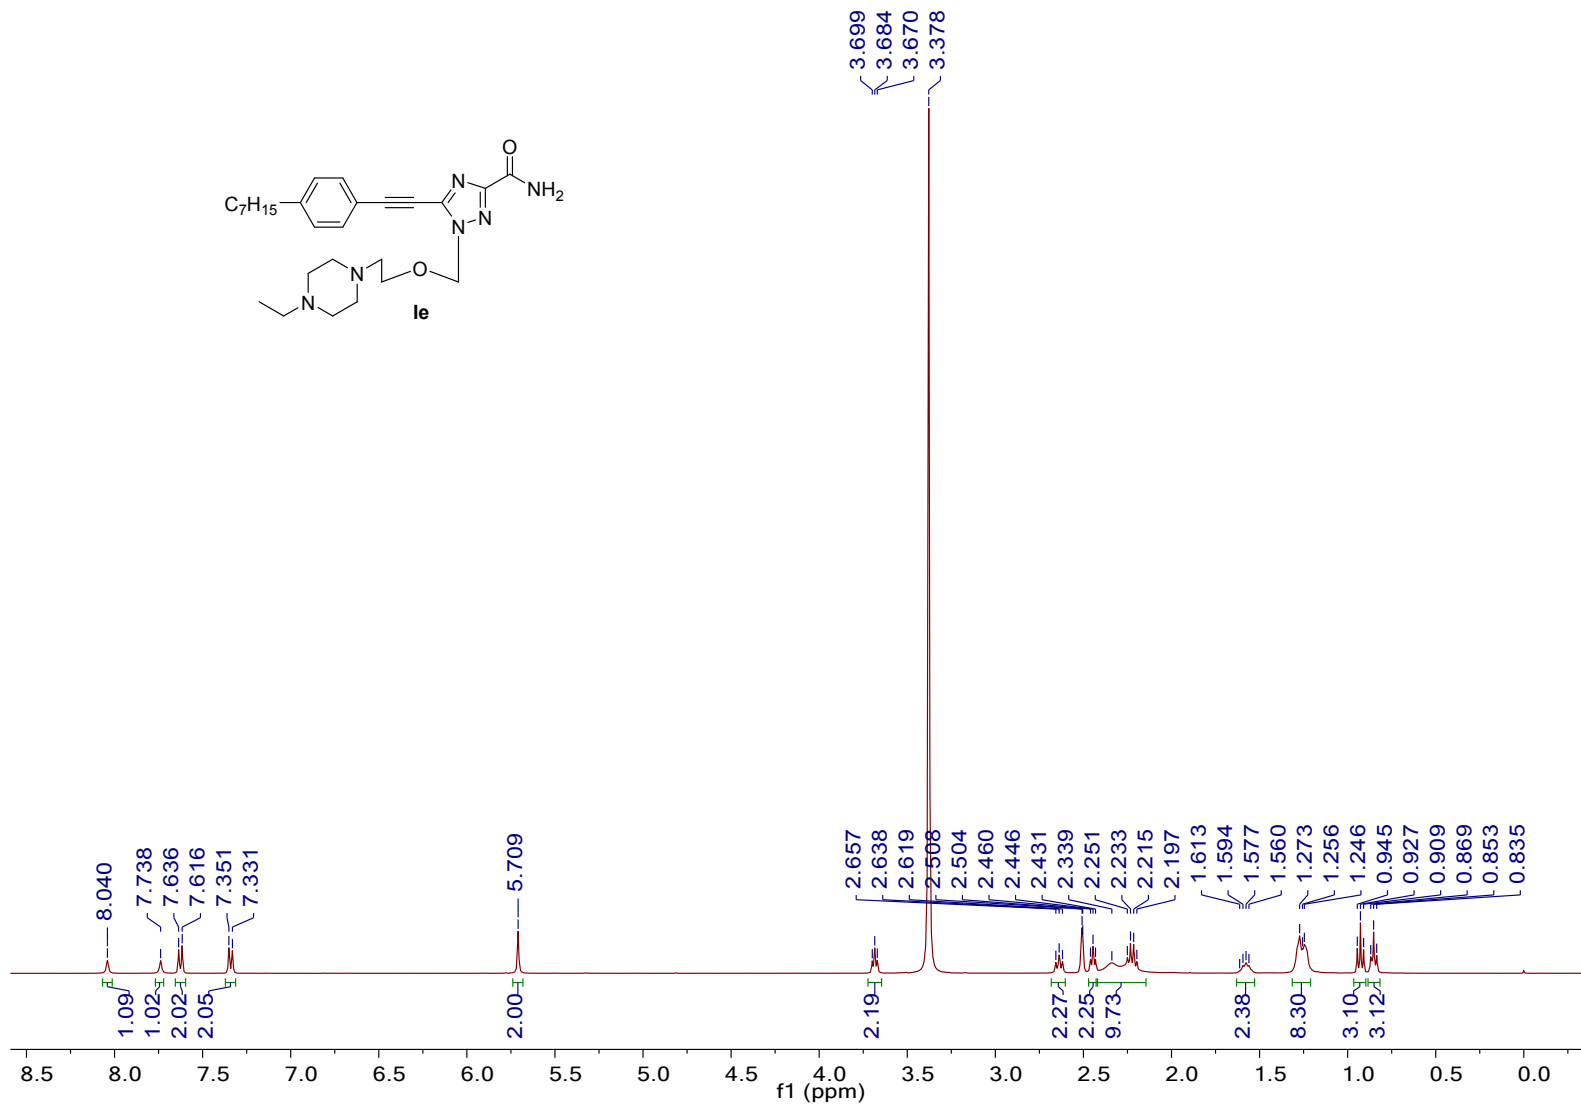

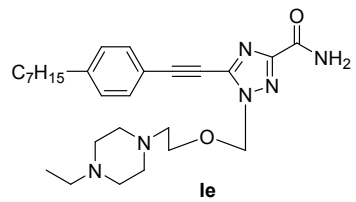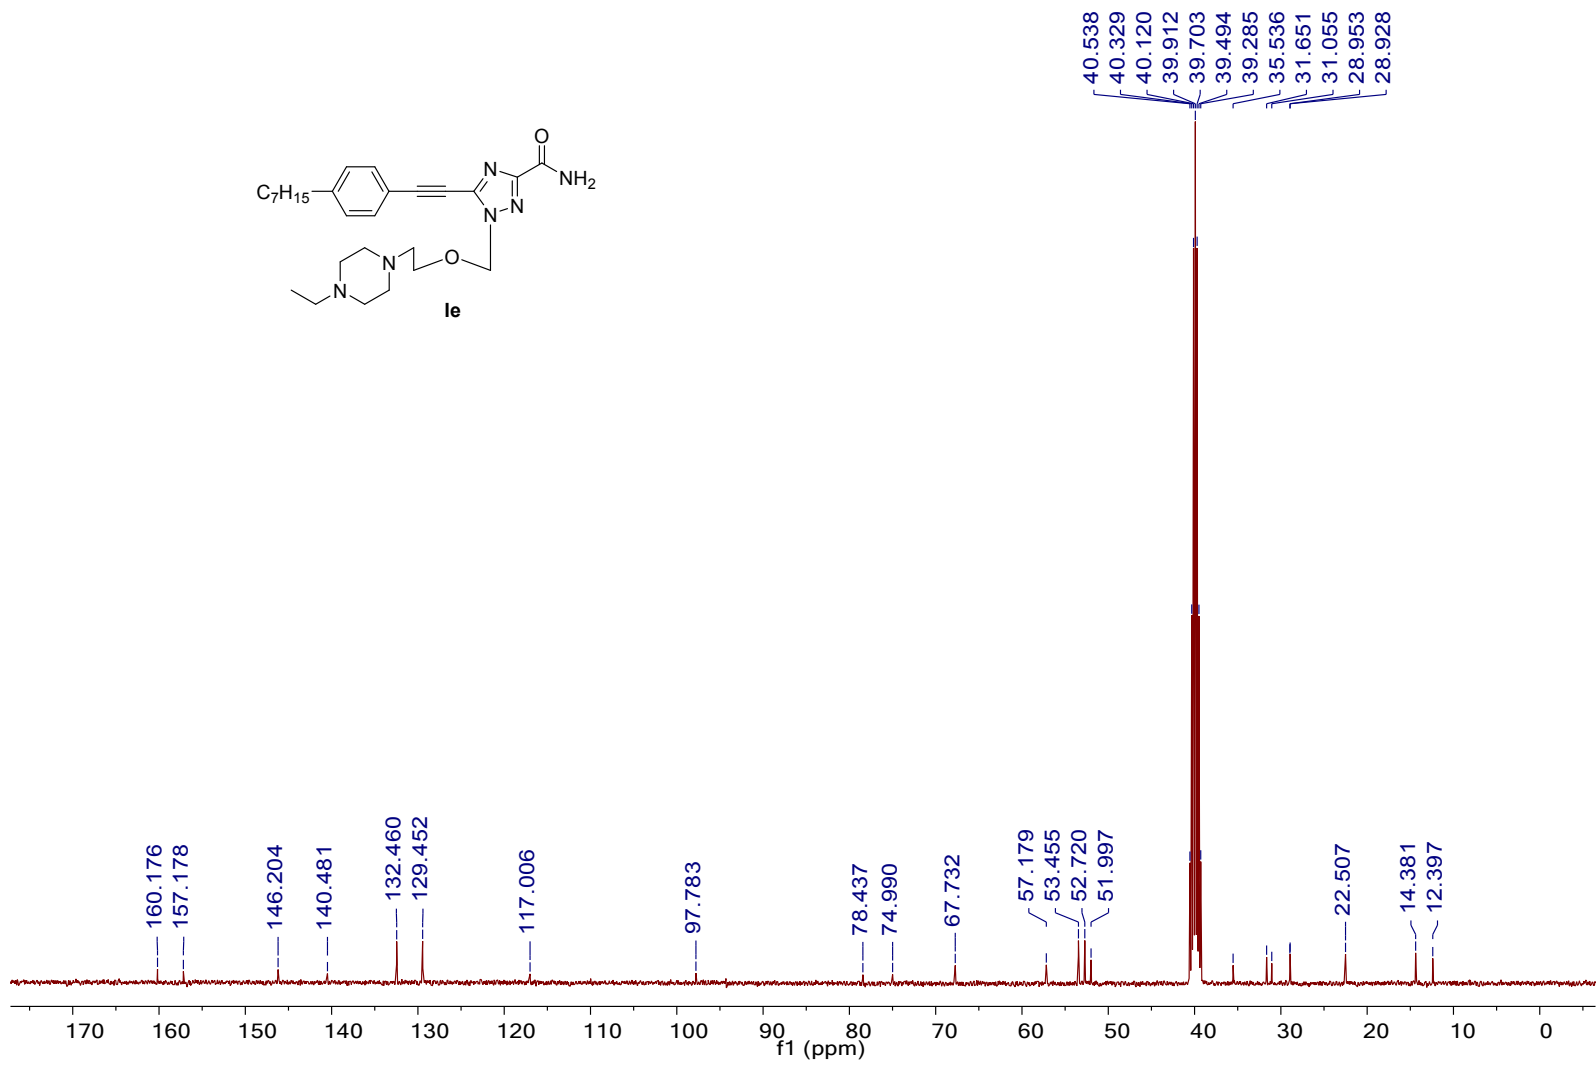

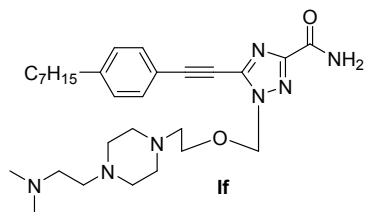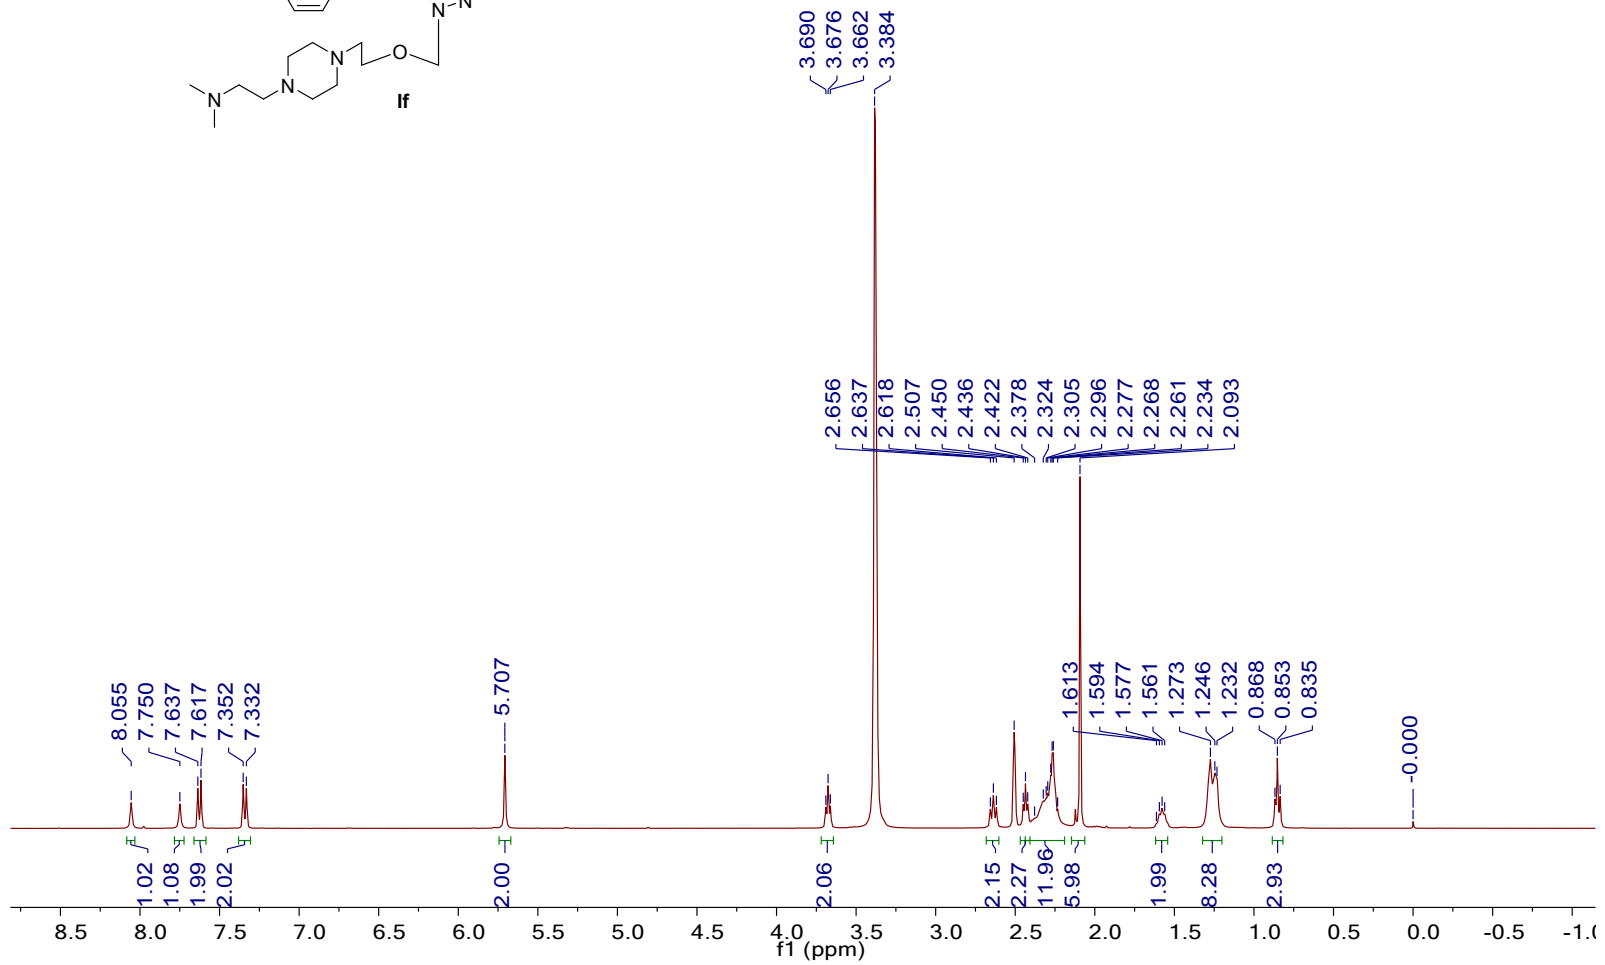

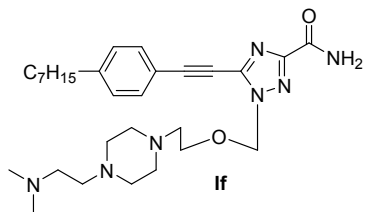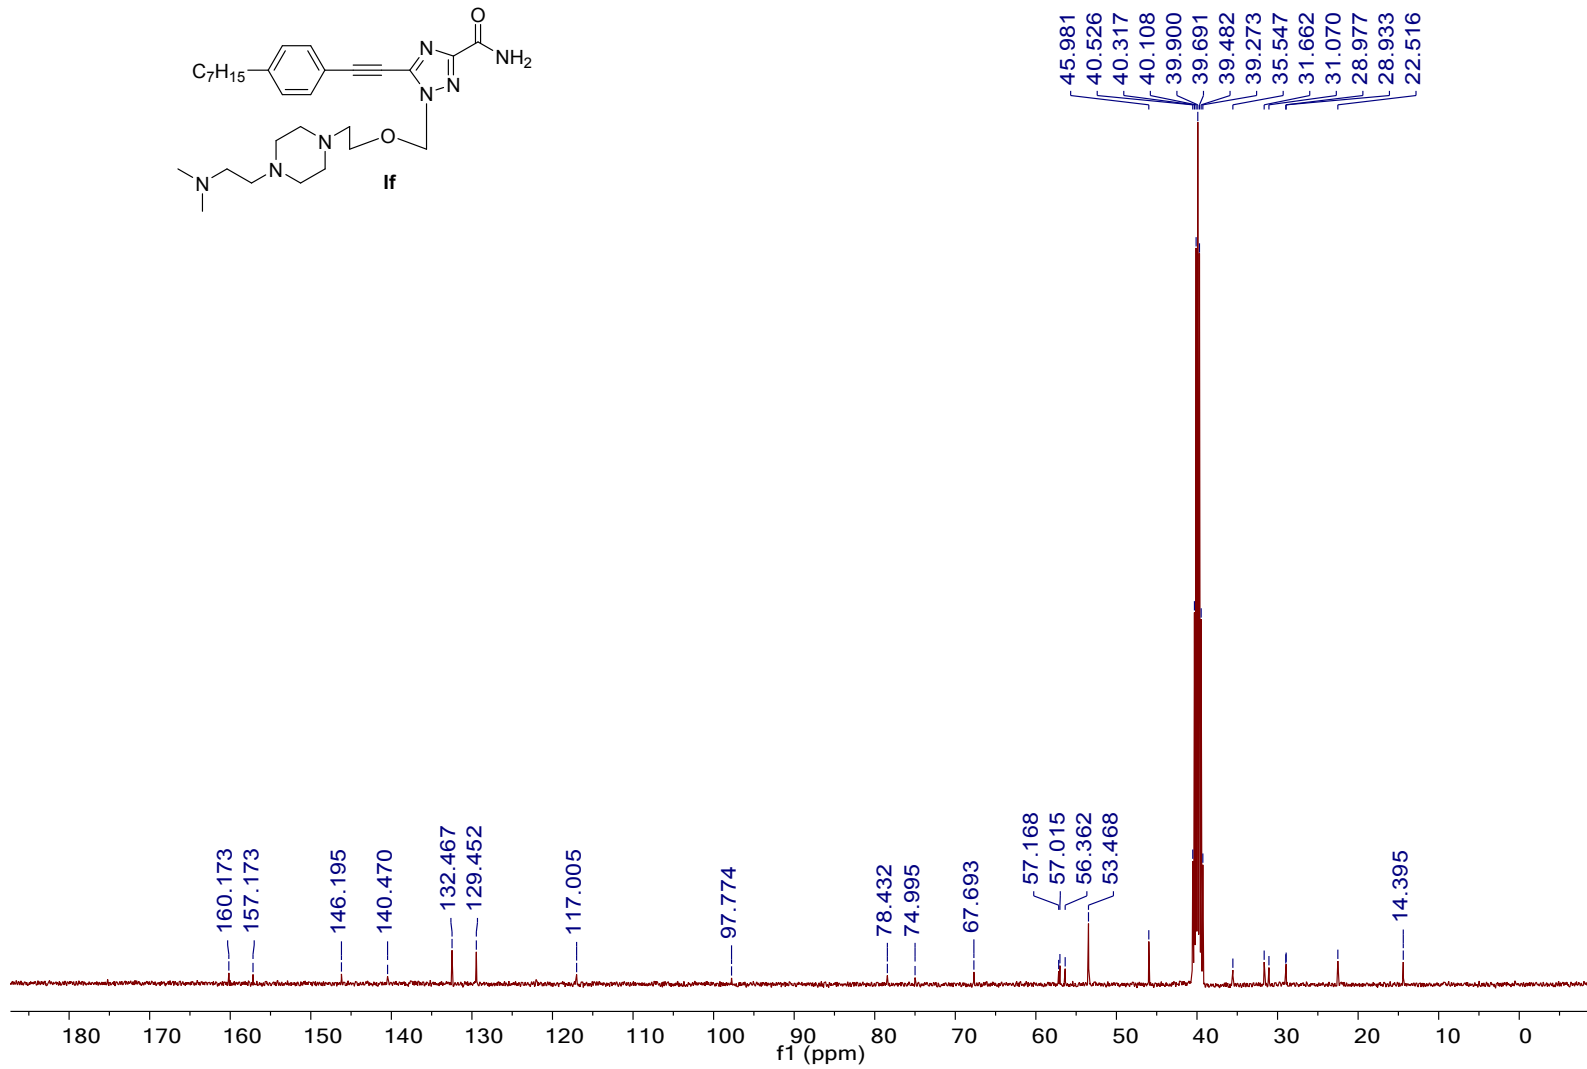



VWD1 A, Wavelength=282 nm (ZYH\2018-12-12 18-03-42.D)

| # | [min]  |    | [min]  | [mAU*s]   | [mAU]      | %       |
|---|--------|----|--------|-----------|------------|---------|
| 1 | 19.532 | BV | 0.1091 | 61.79187  | 8.88809    | 0.1638  |
| 2 | 25.828 | VV | 0.2404 | 95.90890  | 6.10094    | 0.2542  |
| 3 | 27.223 | VB | 0.3232 | 3.75758e4 | 1745.40283 | 99.5821 |

### Method 1

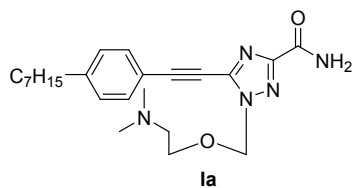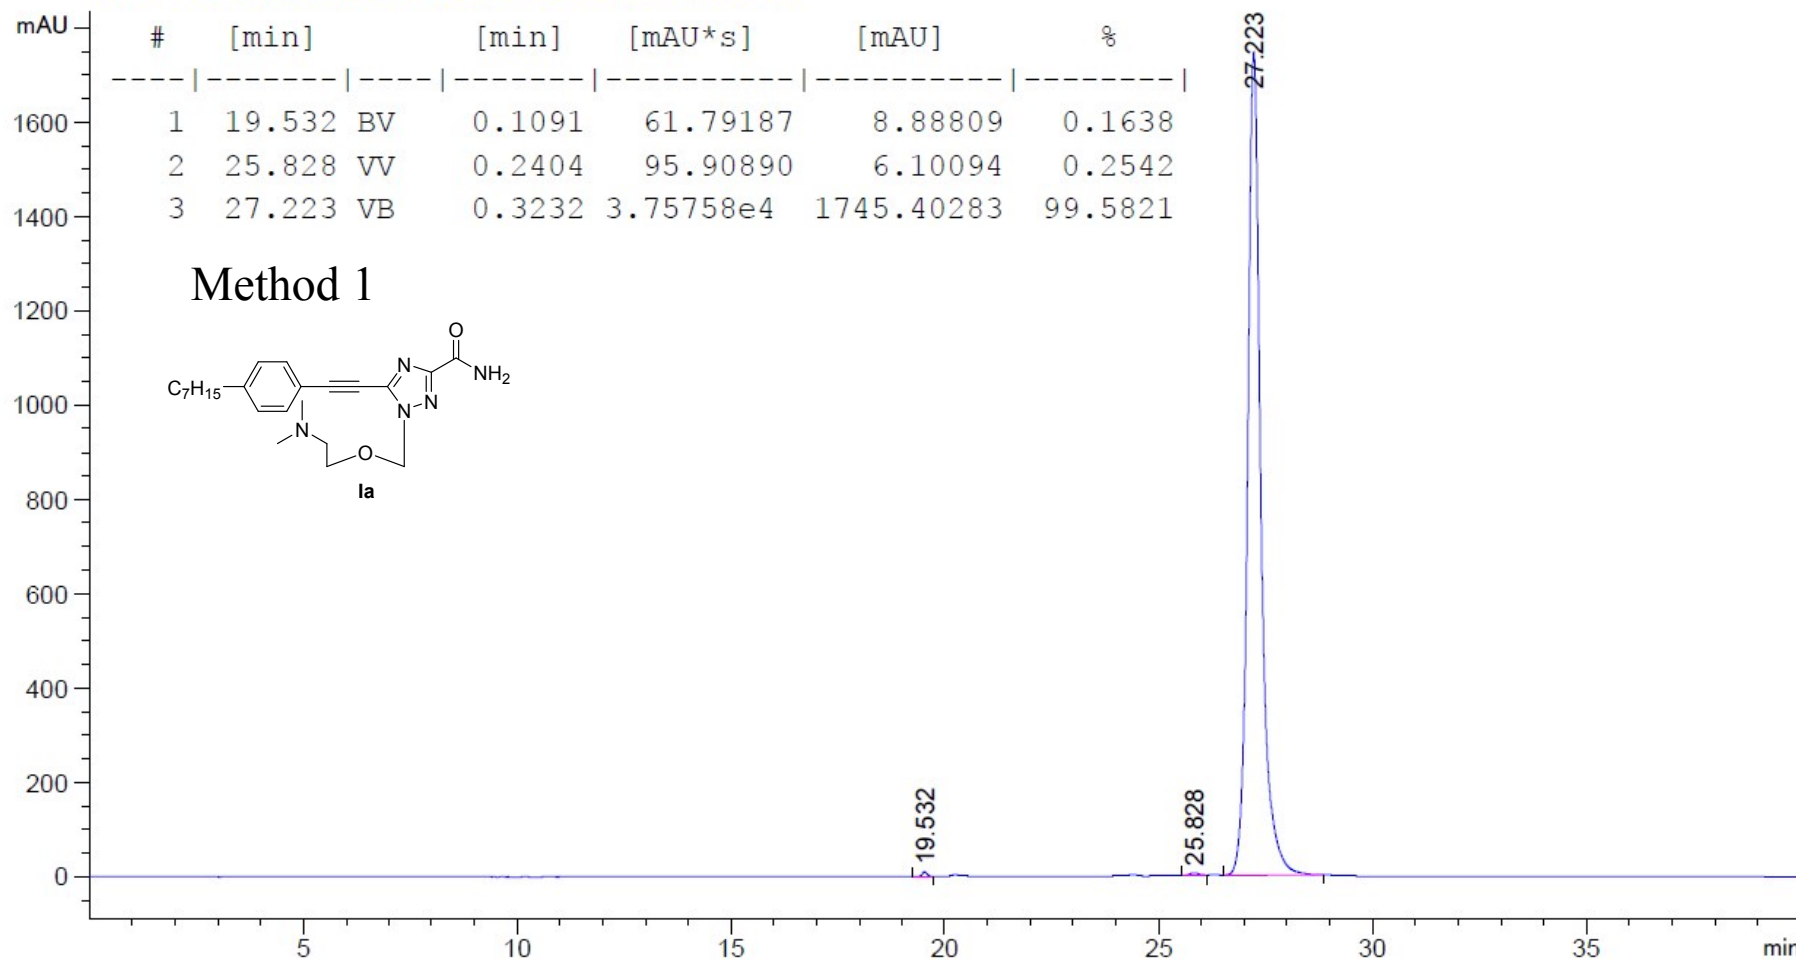

VWD1 A, Wavelength=282 nm (DEF\_LC 2018-12-22 08-42-27\014-1001.D)

| # | [min]  |    | [min]  | [mAU*s]   | [mAU]      | %       |
|---|--------|----|--------|-----------|------------|---------|
| 1 | 19.161 | BB | 0.0906 | 40.11441  | 6.72241    | 0.1895  |
| 2 | 23.502 | VB | 0.0995 | 27.84568  | 4.30075    | 0.1315  |
| 3 | 24.490 | BB | 0.1292 | 102.67084 | 11.83738   | 0.4850  |
| 4 | 25.212 | BV | 0.1243 | 2.09991e4 | 2654.20874 | 99.1940 |

## Method 2

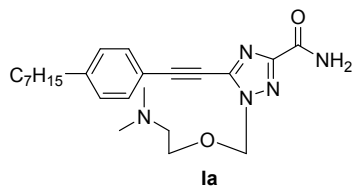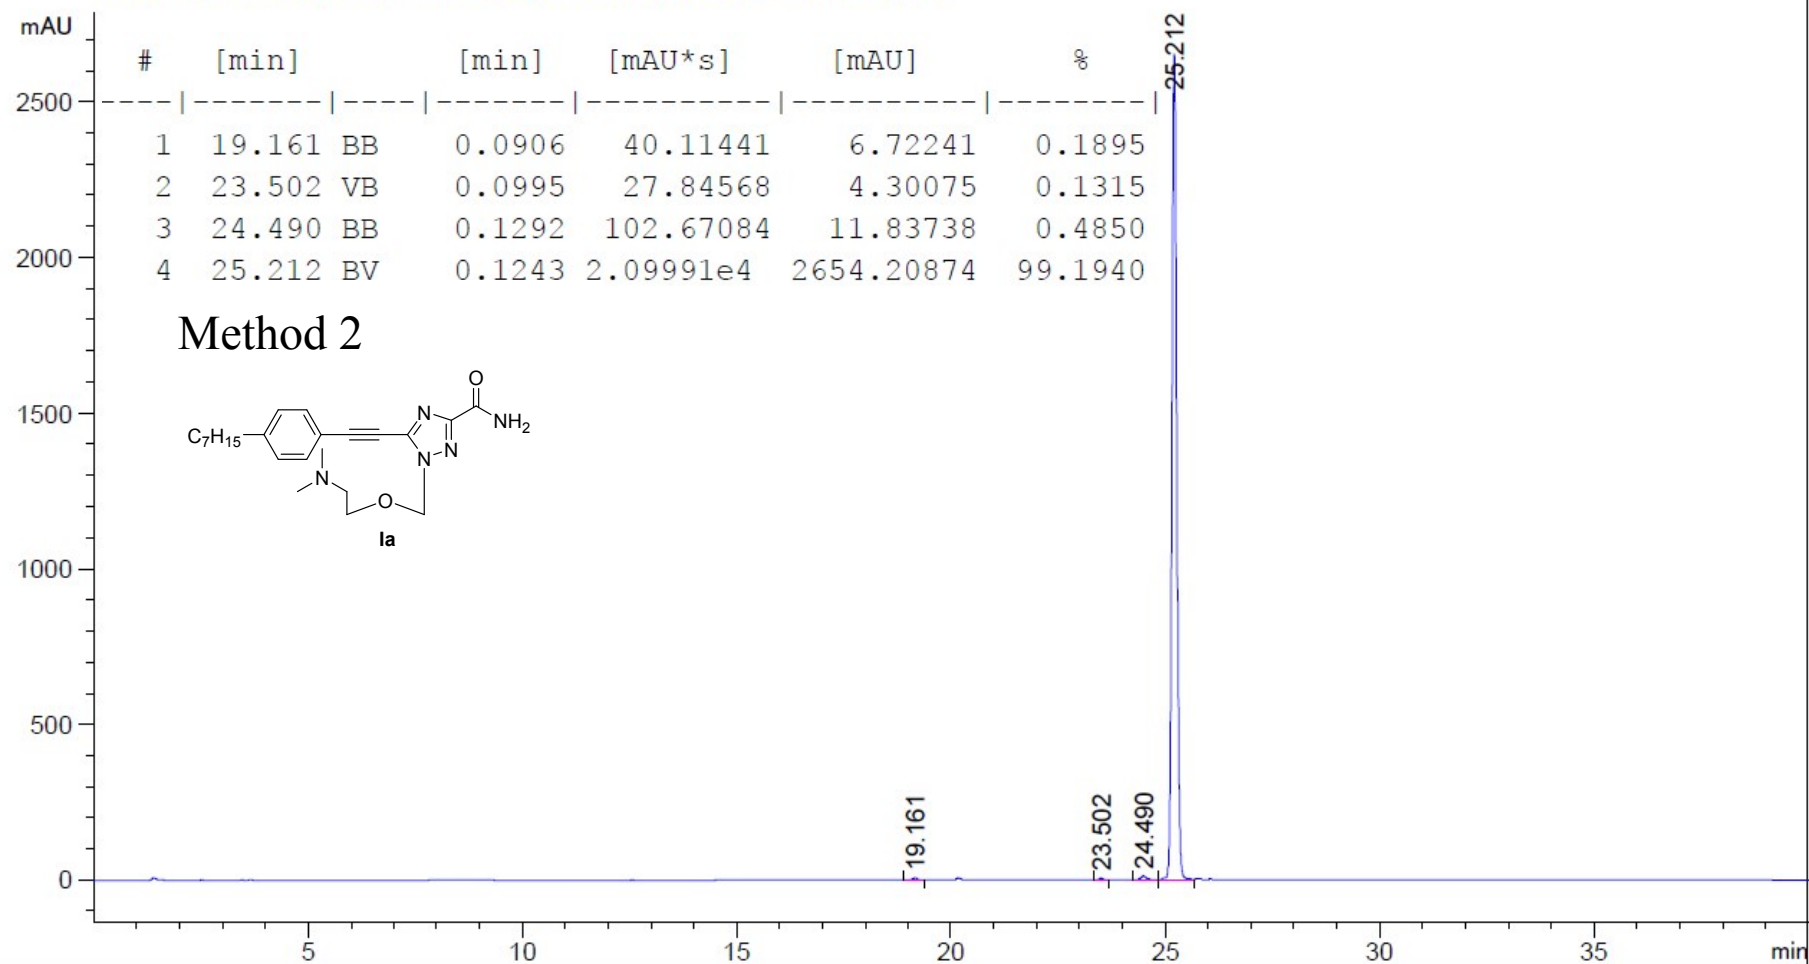

VWD1 A, Wavelength=282 nm (DEF\_LC 2018-12-14 10-09-08\007-0701.D)

| # | [min]  | [min] | [min]  | [mAU*s]   | [mAU]     | %       |
|---|--------|-------|--------|-----------|-----------|---------|
| 1 | 20.379 | BB    | 0.1821 | 22.00592  | 1.83315   | 0.0958  |
| 2 | 28.232 | BB    | 0.2939 | 31.49033  | 1.70969   | 0.1371  |
| 3 | 30.306 | BB    | 0.4702 | 2.29118e4 | 731.91895 | 99.7671 |

### Method 1

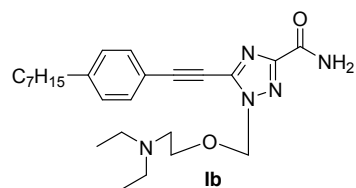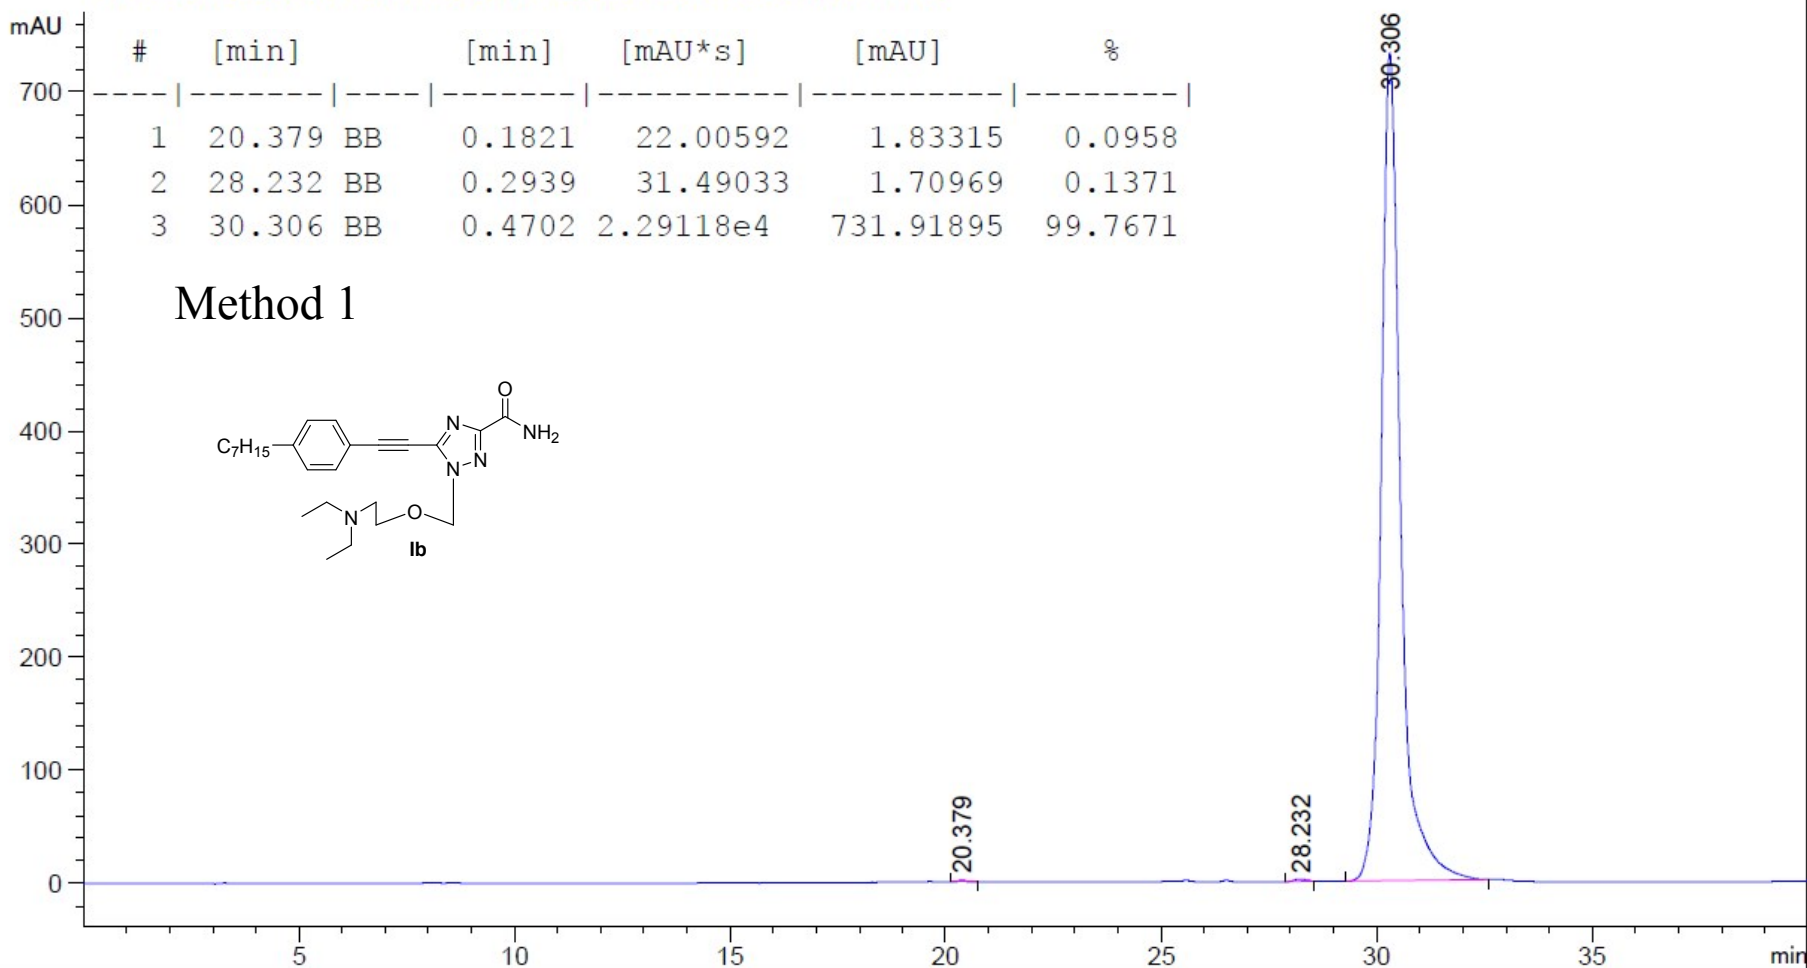

VWD1 A, Wavelength=282 nm (DEF\_LC 2018-12-22 08-42-27\003-0301.D)

| # | [min]  | [min] | [mAU*s] | [mAU]     | %          |         |
|---|--------|-------|---------|-----------|------------|---------|
| 1 | 20.216 | BB    | 0.1306  | 37.04685  | 4.17064    | 0.1267  |
| 2 | 25.674 | VV    | 0.1470  | 104.88651 | 10.82866   | 0.3587  |
| 3 | 26.612 | BV    | 0.1621  | 2.90245e4 | 2819.25488 | 99.2492 |
| 4 | 27.762 | BB    | 0.1821  | 77.63691  | 6.70219    | 0.2655  |

### Method 2

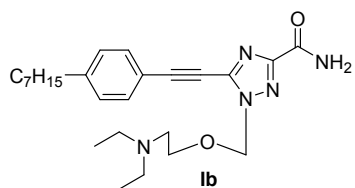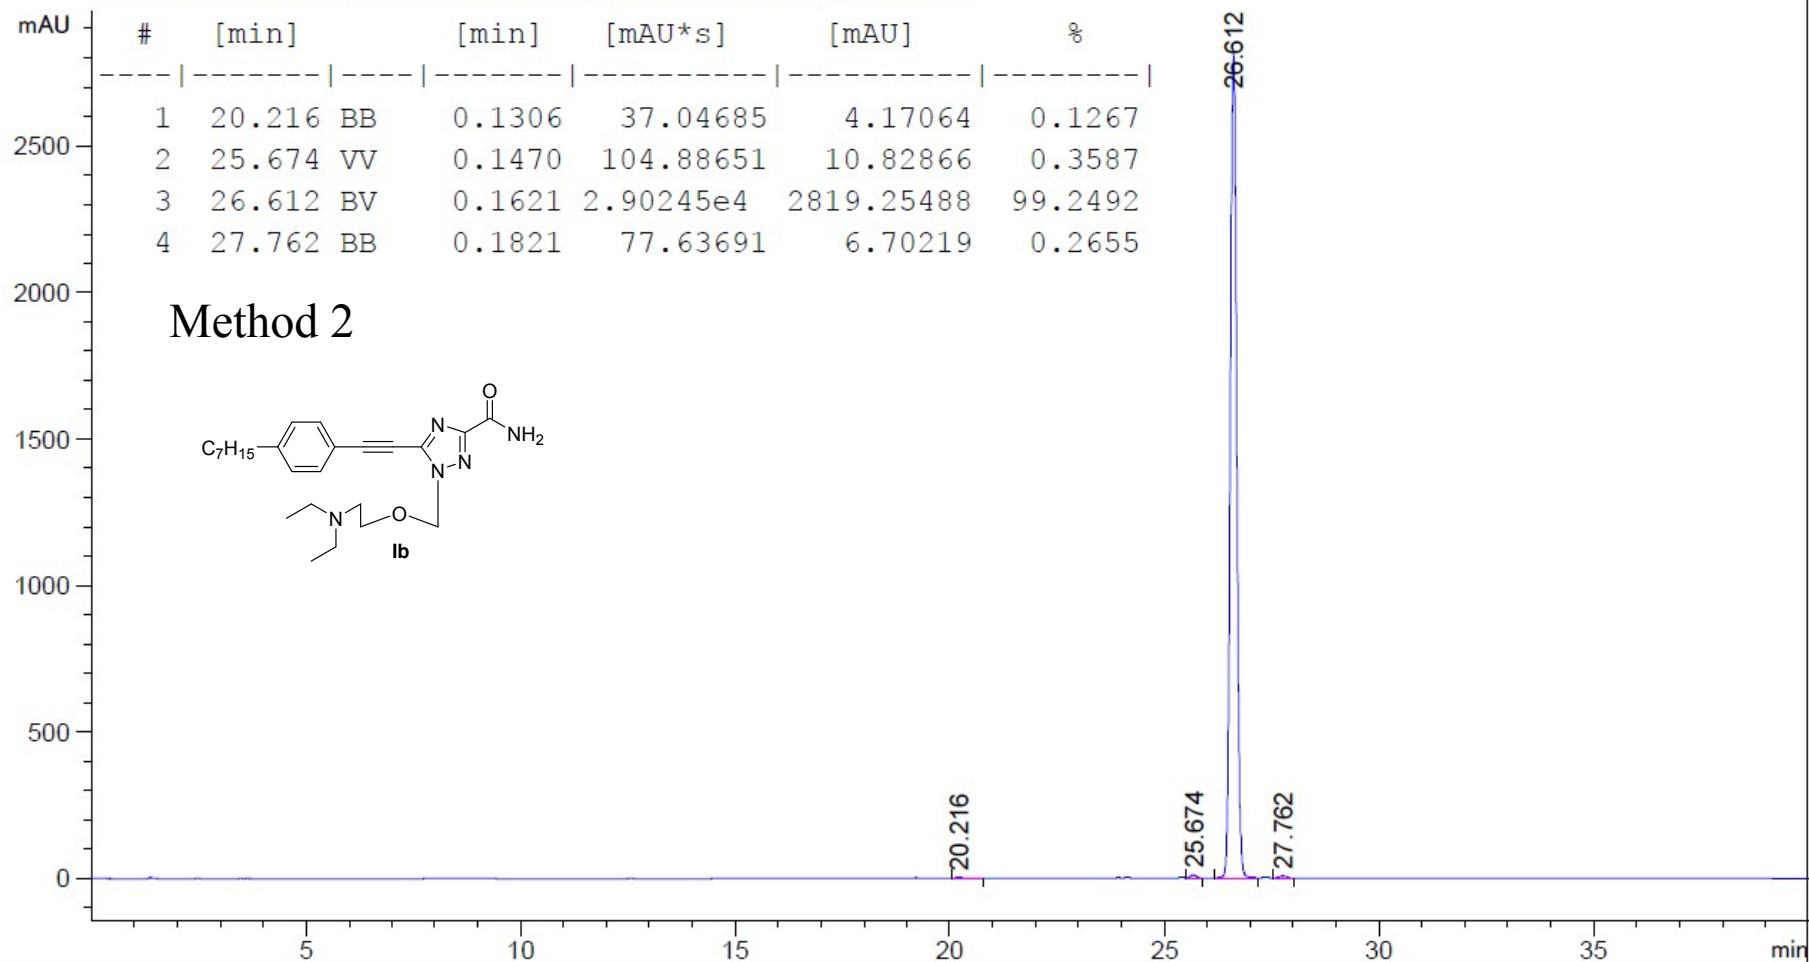

VWD1 A, Wavelength=282 nm (DEF\_LC 2018-12-14 10-09-08\003-0301.D)

| # | [min]  |    | [min]  | [mAU*s]   | [mAU]     | %       |
|---|--------|----|--------|-----------|-----------|---------|
| 1 | 19.564 | BB | 0.1104 | 23.76811  | 3.36519   | 0.0846  |
| 2 | 20.310 | BV | 0.1722 | 19.87856  | 1.76816   | 0.0708  |
| 3 | 20.567 | VB | 0.1264 | 45.03757  | 5.39321   | 0.1604  |
| 4 | 25.012 | BB | 0.2138 | 49.48160  | 3.50395   | 0.1762  |
| 5 | 27.435 | BV | 0.3438 | 109.54131 | 4.84394   | 0.3901  |
| 6 | 27.854 | VB | 0.3468 | 78.93027  | 3.41363   | 0.2811  |
| 7 | 29.924 | BB | 0.4894 | 2.77533e4 | 848.95642 | 98.8368 |

### Method 1

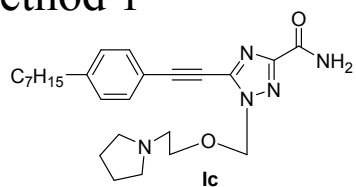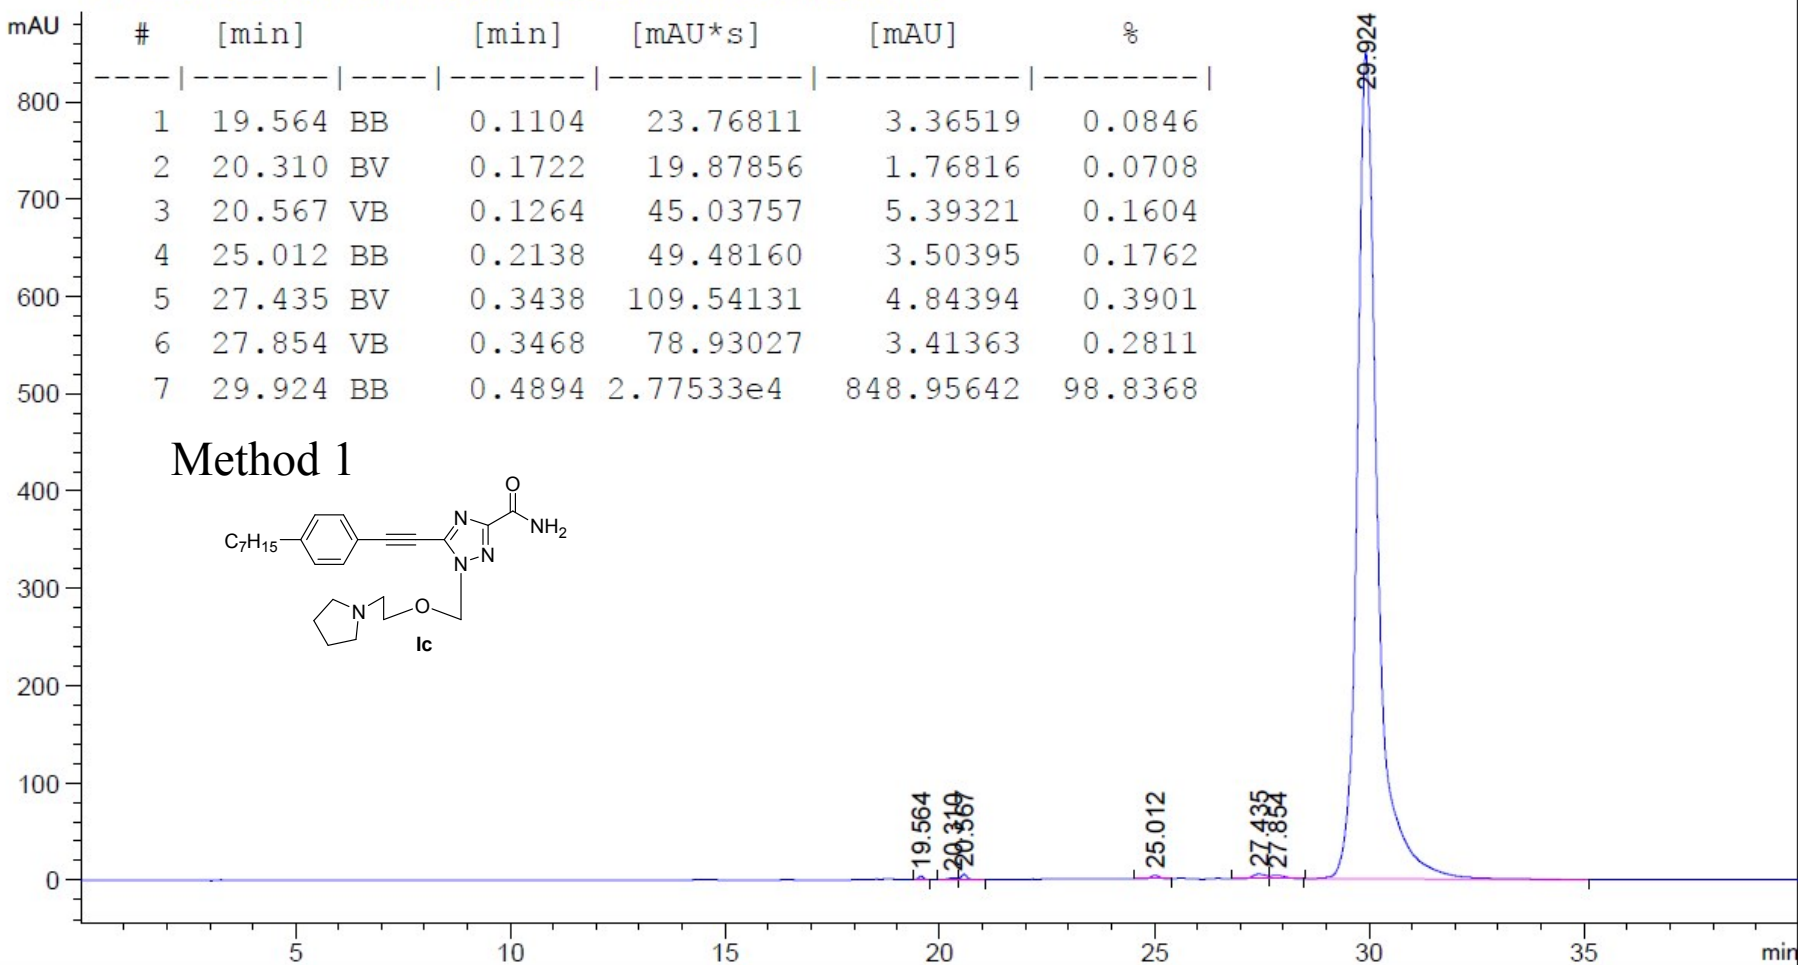

VWD1 A, Wavelength=282 nm (ZYH\2018-12-20 21-21-29.D)

| # | [min]  |    | [min]  | [mAU*s]   | [mAU]      | %       |
|---|--------|----|--------|-----------|------------|---------|
| 1 | 1.331  | BB | 0.0851 | 25.86342  | 4.56582    | 0.1210  |
| 2 | 20.254 | BB | 0.1315 | 108.20570 | 13.07774   | 0.5064  |
| 3 | 23.831 | VV | 0.1132 | 72.69968  | 9.50436    | 0.3402  |
| 4 | 24.238 | VV | 0.1531 | 33.63911  | 2.99310    | 0.1574  |
| 5 | 25.103 | BV | 0.1172 | 84.21170  | 11.00987   | 0.3941  |
| 6 | 25.327 | VB | 0.1361 | 78.09071  | 8.74866    | 0.3655  |
| 7 | 25.856 | BV | 0.1277 | 34.92341  | 4.30091    | 0.1634  |
| 8 | 26.178 | VV | 0.1448 | 2.08860e4 | 2260.82813 | 97.7500 |
| 9 | 26.862 | VB | 0.2452 | 43.11064  | 2.76031    | 0.2018  |

## Method 2

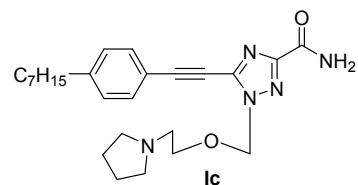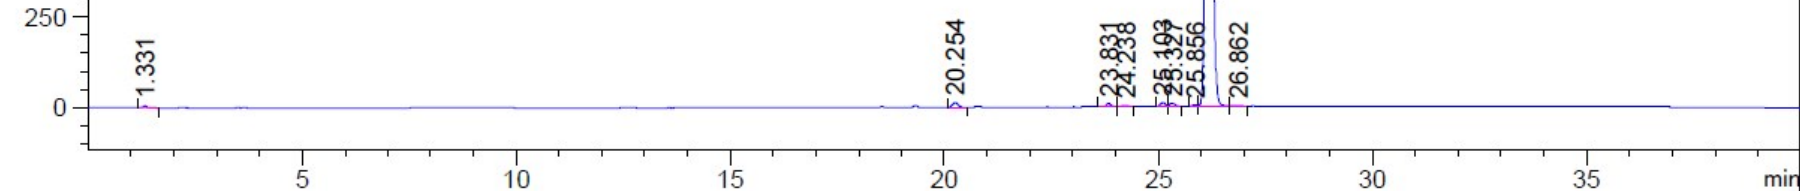

VWD1 A, Wavelength=282 nm (DEF\_LC 2018-12-14 10-09-08\002-0201.D)

| # | [min]  |    | [min]  | [mAU*s]   | [mAU]      | %       |
|---|--------|----|--------|-----------|------------|---------|
| 1 | 28.982 | BB | 0.3603 | 82.48223  | 3.52157    | 0.1779  |
| 2 | 31.320 | BB | 0.5211 | 4.62780e4 | 1332.84741 | 99.8221 |

### Method 1

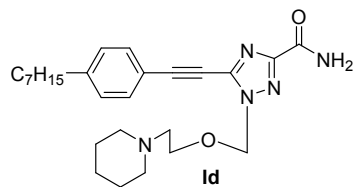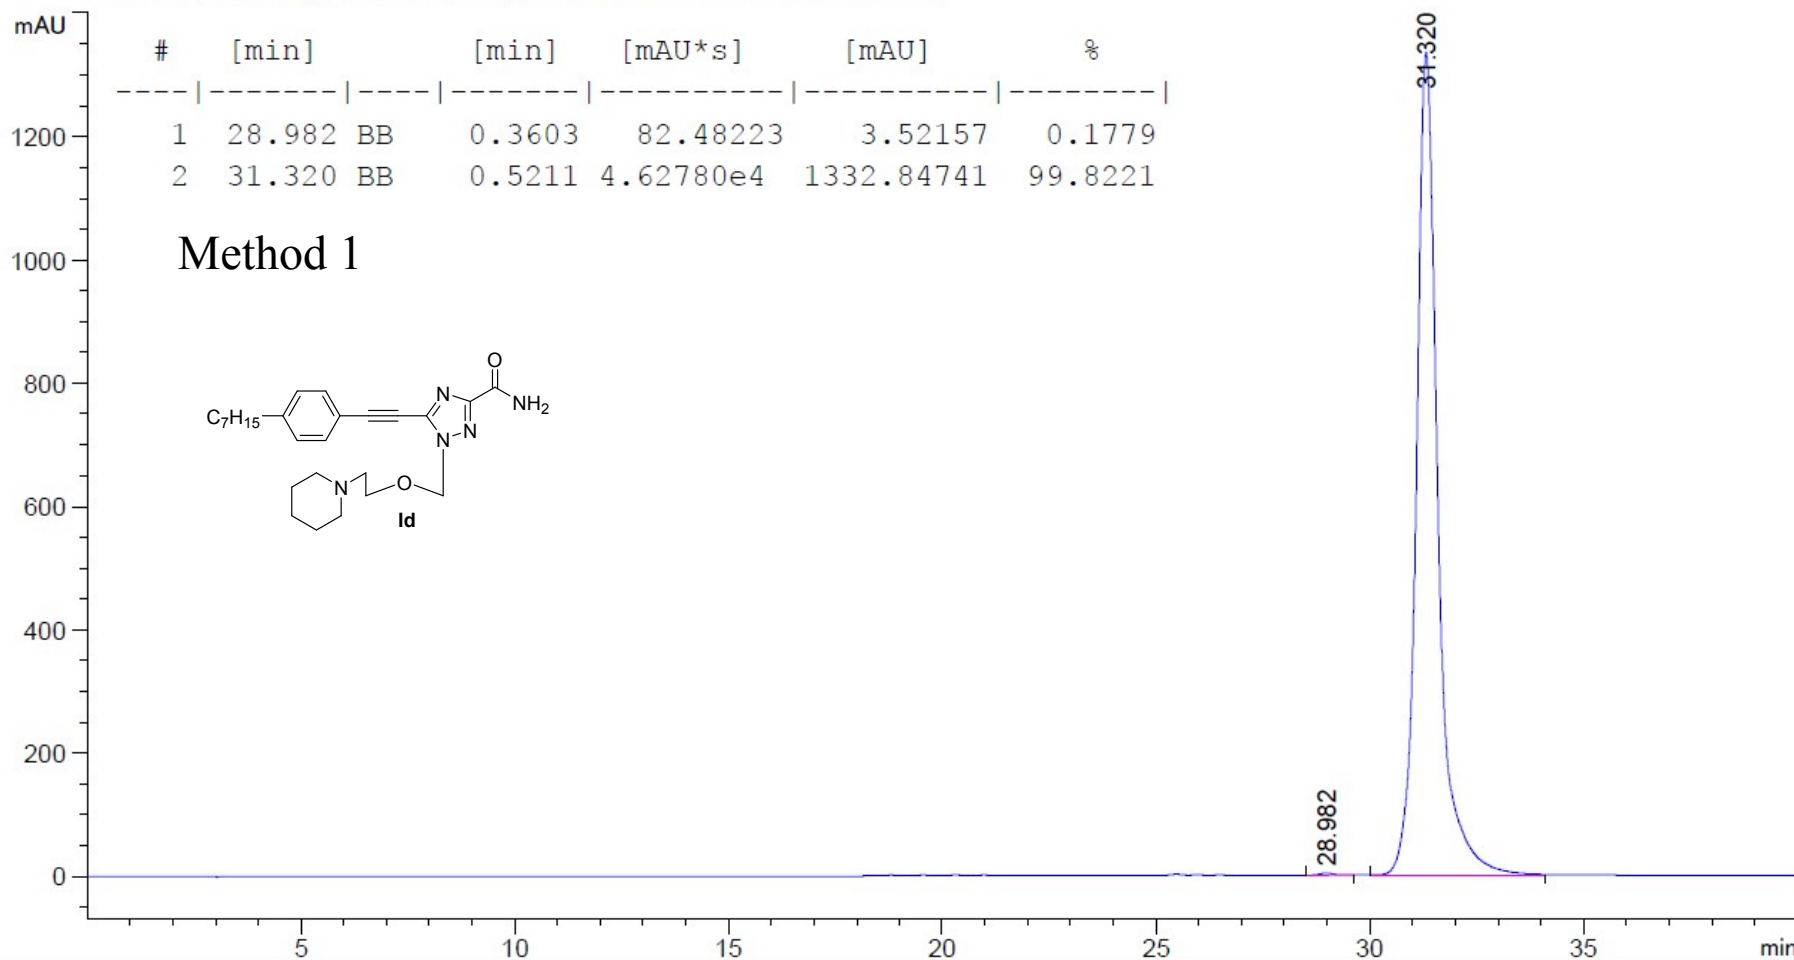

VWD1 A, Wavelength=282 nm (DEF\_LC 2018-12-21 15-32-17\002-0201.D)

| # | [min]  | [min] | [mAU*s] | [mAU]     | %          |         |
|---|--------|-------|---------|-----------|------------|---------|
| 1 | 19.281 | BB    | 0.0859  | 36.10543  | 6.49374    | 0.0993  |
| 2 | 20.220 | BV    | 0.1249  | 63.97433  | 7.70331    | 0.1759  |
| 3 | 24.099 | BV    | 0.1079  | 88.99277  | 12.38101   | 0.2447  |
| 4 | 25.790 | BV    | 0.1359  | 99.83530  | 11.20909   | 0.2745  |
| 5 | 26.679 | BV    | 0.1853  | 3.60774e4 | 3065.24707 | 99.2056 |

### Method 2

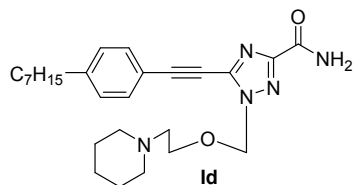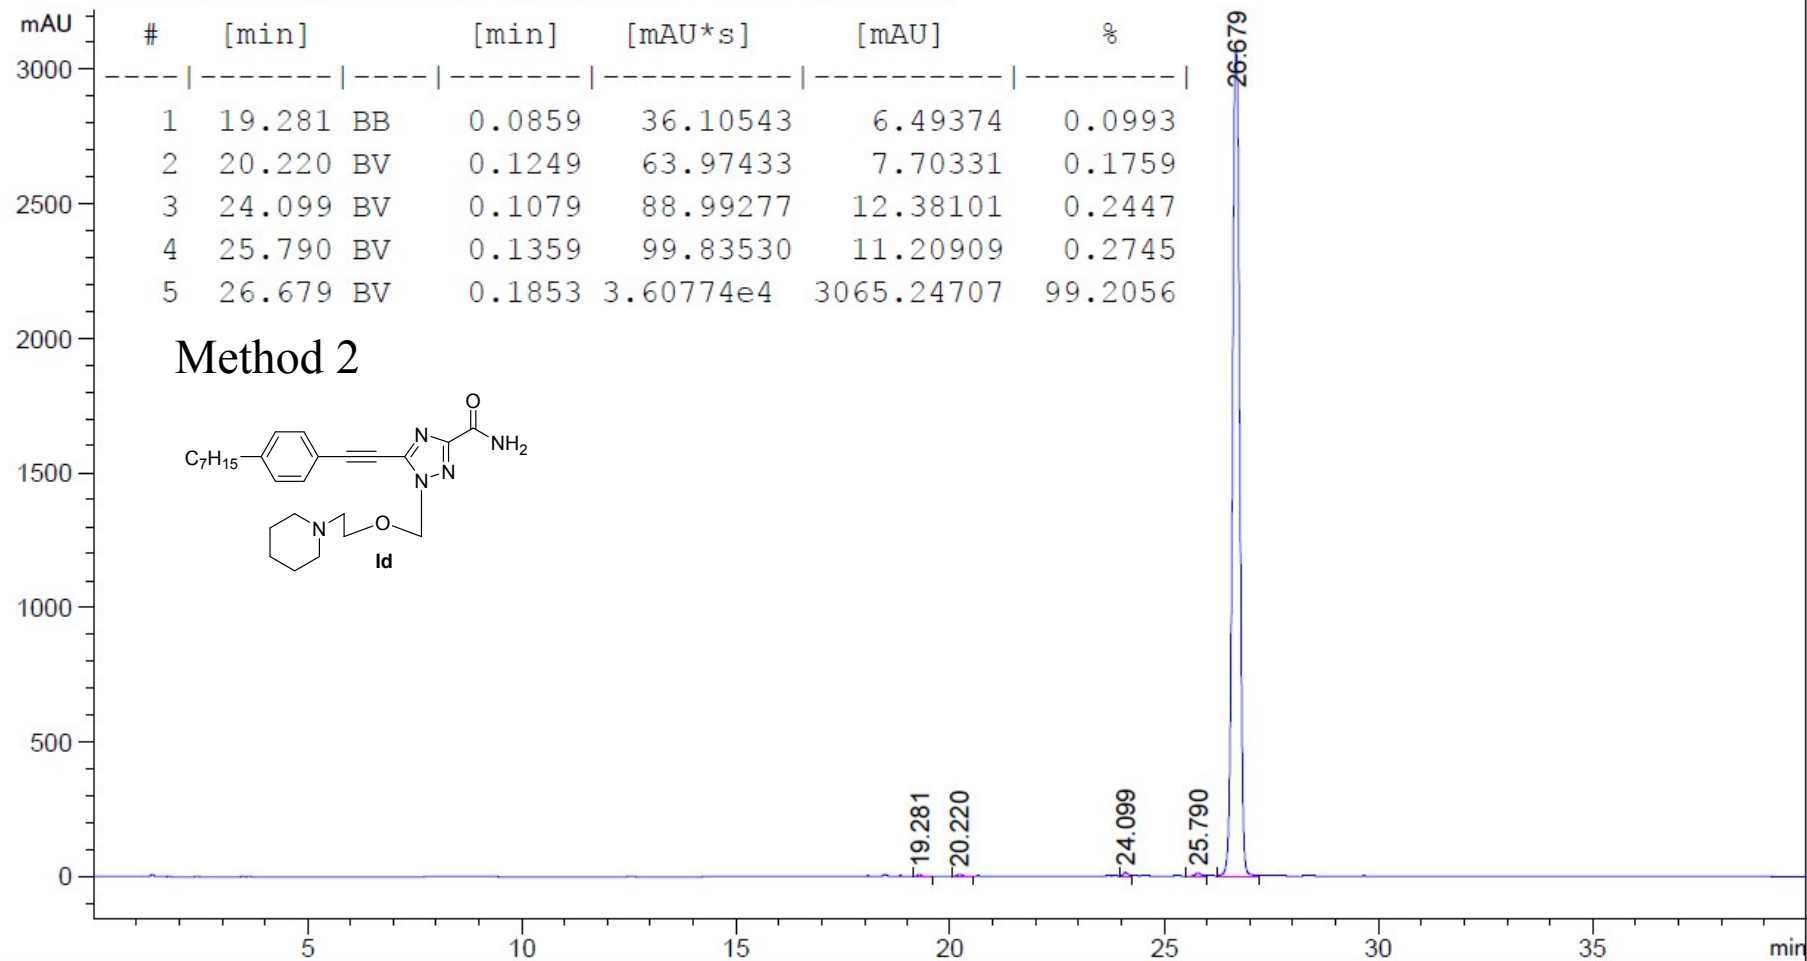



VWD1 A, Wavelength=282 nm (DEF\_LC 2018-12-14 10-09-08\005-0501.D)

| # | [min]  |    | [min]  | [mAU*s]   | [mAU]      | %       |
|---|--------|----|--------|-----------|------------|---------|
| 1 | 19.978 | BV | 0.1192 | 48.98259  | 6.40329    | 0.1226  |
| 2 | 25.262 | VV | 0.2278 | 62.23179  | 4.08401    | 0.1558  |
| 3 | 25.569 | VB | 0.2181 | 47.68205  | 3.36975    | 0.1194  |
| 4 | 26.360 | BB | 0.3354 | 118.62890 | 5.37627    | 0.2970  |
| 5 | 27.928 | BB | 0.3560 | 3.96683e4 | 1664.50720 | 99.3052 |

### Method 1

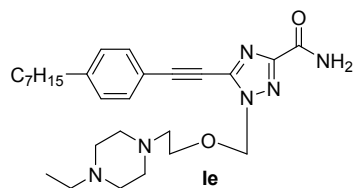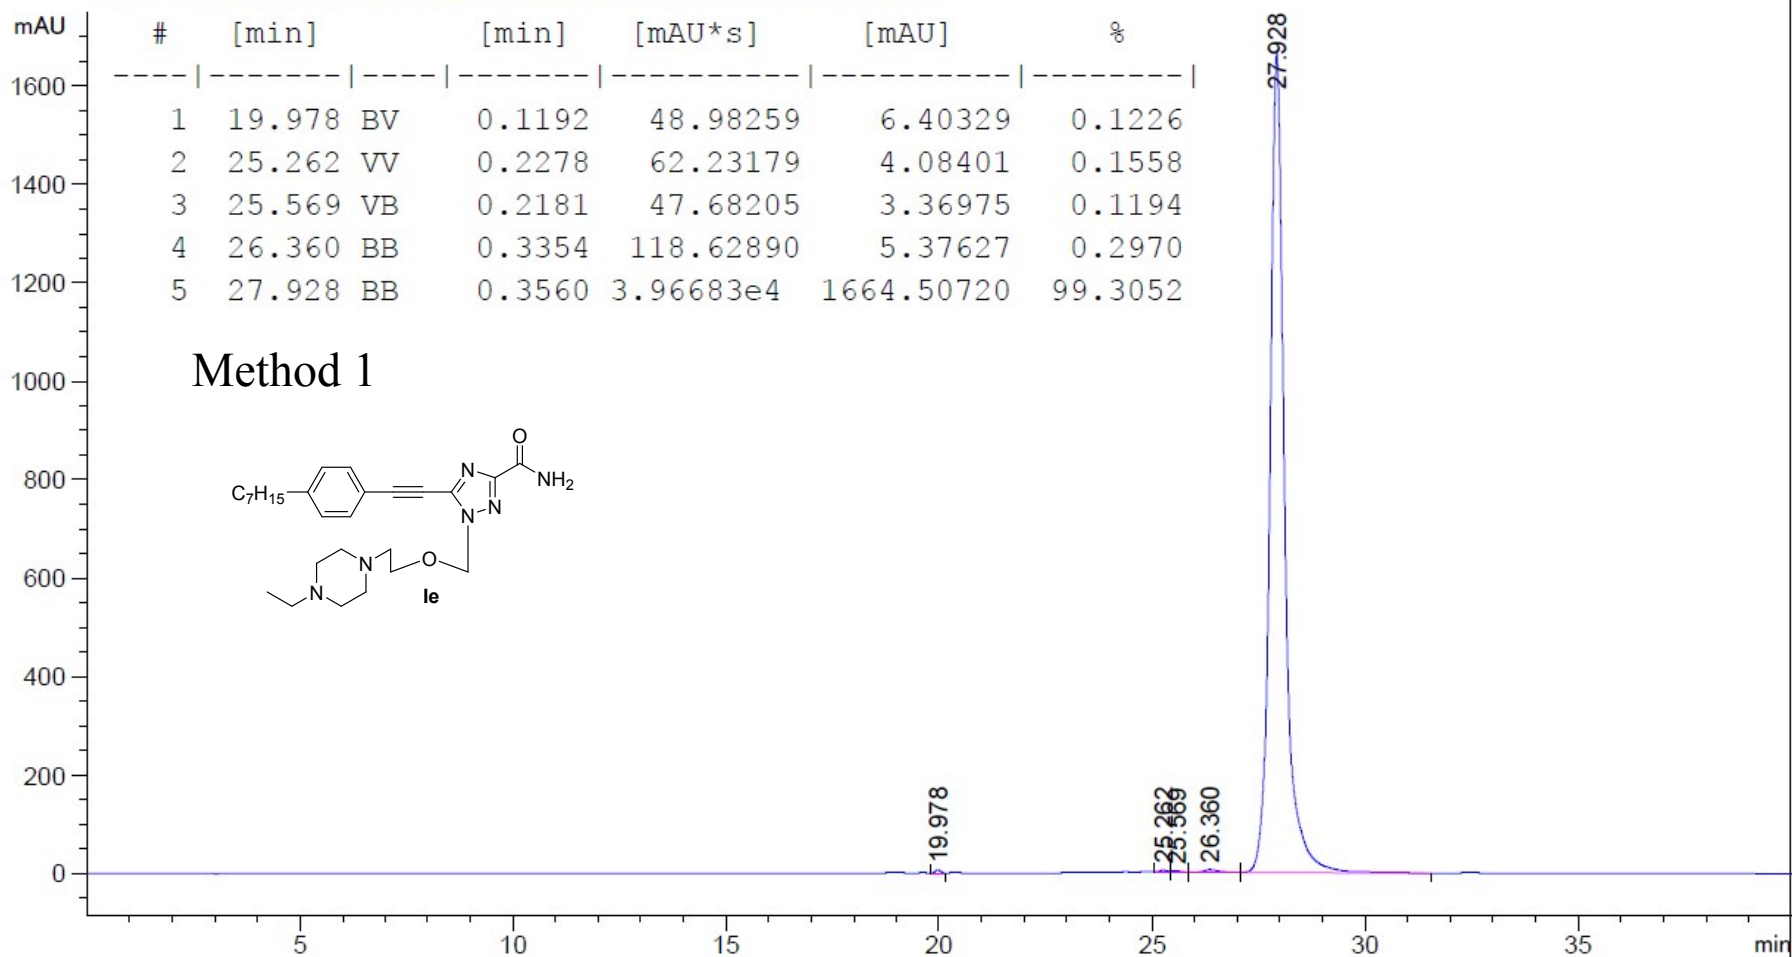

VWD1 A, Wavelength=282 nm (DEF\_LC 2018-12-21 15-32-17\001-0101.D)

| # | [min]  | [min] | [mAU*s] | [mAU]     | %          |         |
|---|--------|-------|---------|-----------|------------|---------|
| 1 | 20.179 | BB    | 0.1307  | 166.47066 | 19.67084   | 0.7840  |
| 2 | 23.748 | BV    | 0.0784  | 21.08965  | 4.07154    | 0.0993  |
| 3 | 23.856 | VV    | 0.1059  | 61.25243  | 8.62068    | 0.2885  |
| 4 | 24.097 | VB    | 0.1104  | 40.93974  | 5.66129    | 0.1928  |
| 5 | 24.528 | BB    | 0.1593  | 97.46521  | 8.53028    | 0.4590  |
| 6 | 25.226 | BV    | 0.1274  | 2.08462e4 | 2577.47095 | 98.1764 |

### Method 2

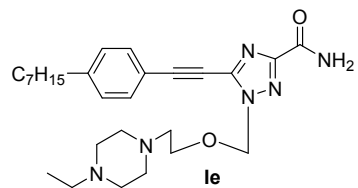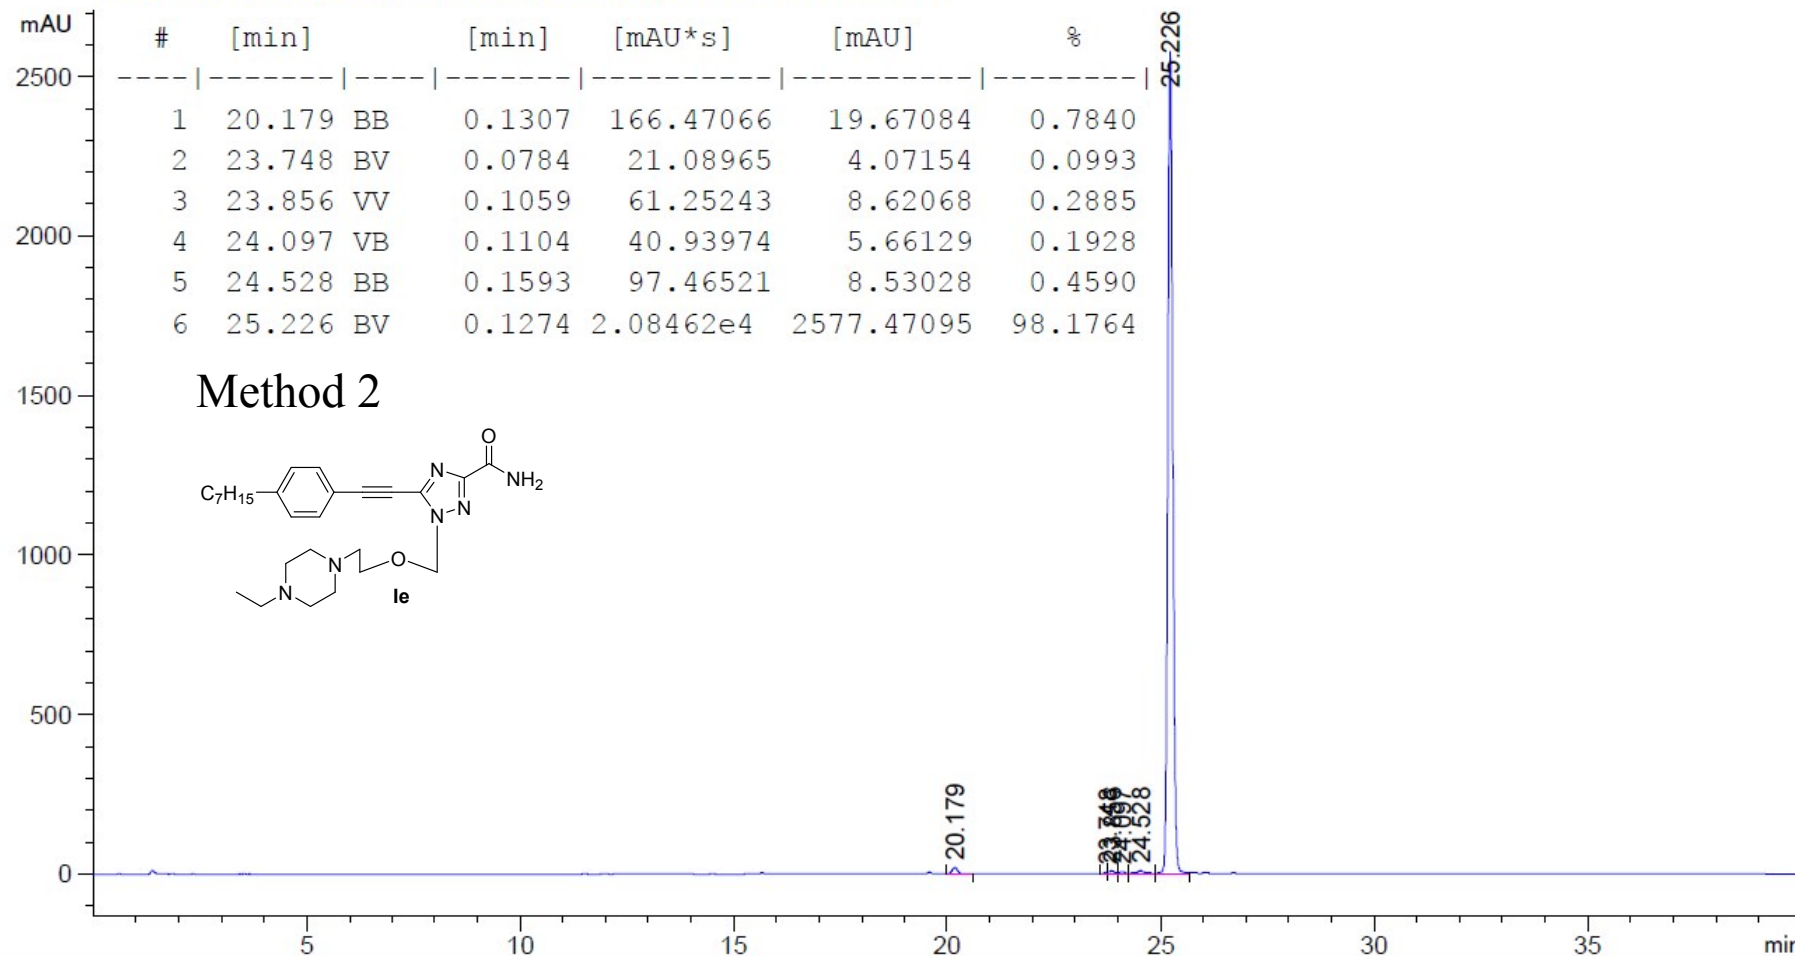

VWD1 A, Wavelength=282 nm (DEF\_LC 2018-12-14 10-09-08\006-0601.D)

| # | [min]  |    | [min]  | [mAU*s]   | [mAU]     | %       |
|---|--------|----|--------|-----------|-----------|---------|
| 1 | 19.828 | VV | 0.1284 | 98.50074  | 11.79999  | 0.4897  |
| 2 | 25.258 | VB | 0.3943 | 339.78537 | 13.42210  | 1.6892  |
| 3 | 28.686 | BB | 0.5759 | 1.96770e4 | 498.10358 | 97.8211 |

### Method 1

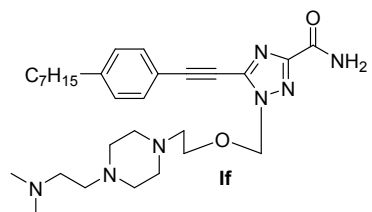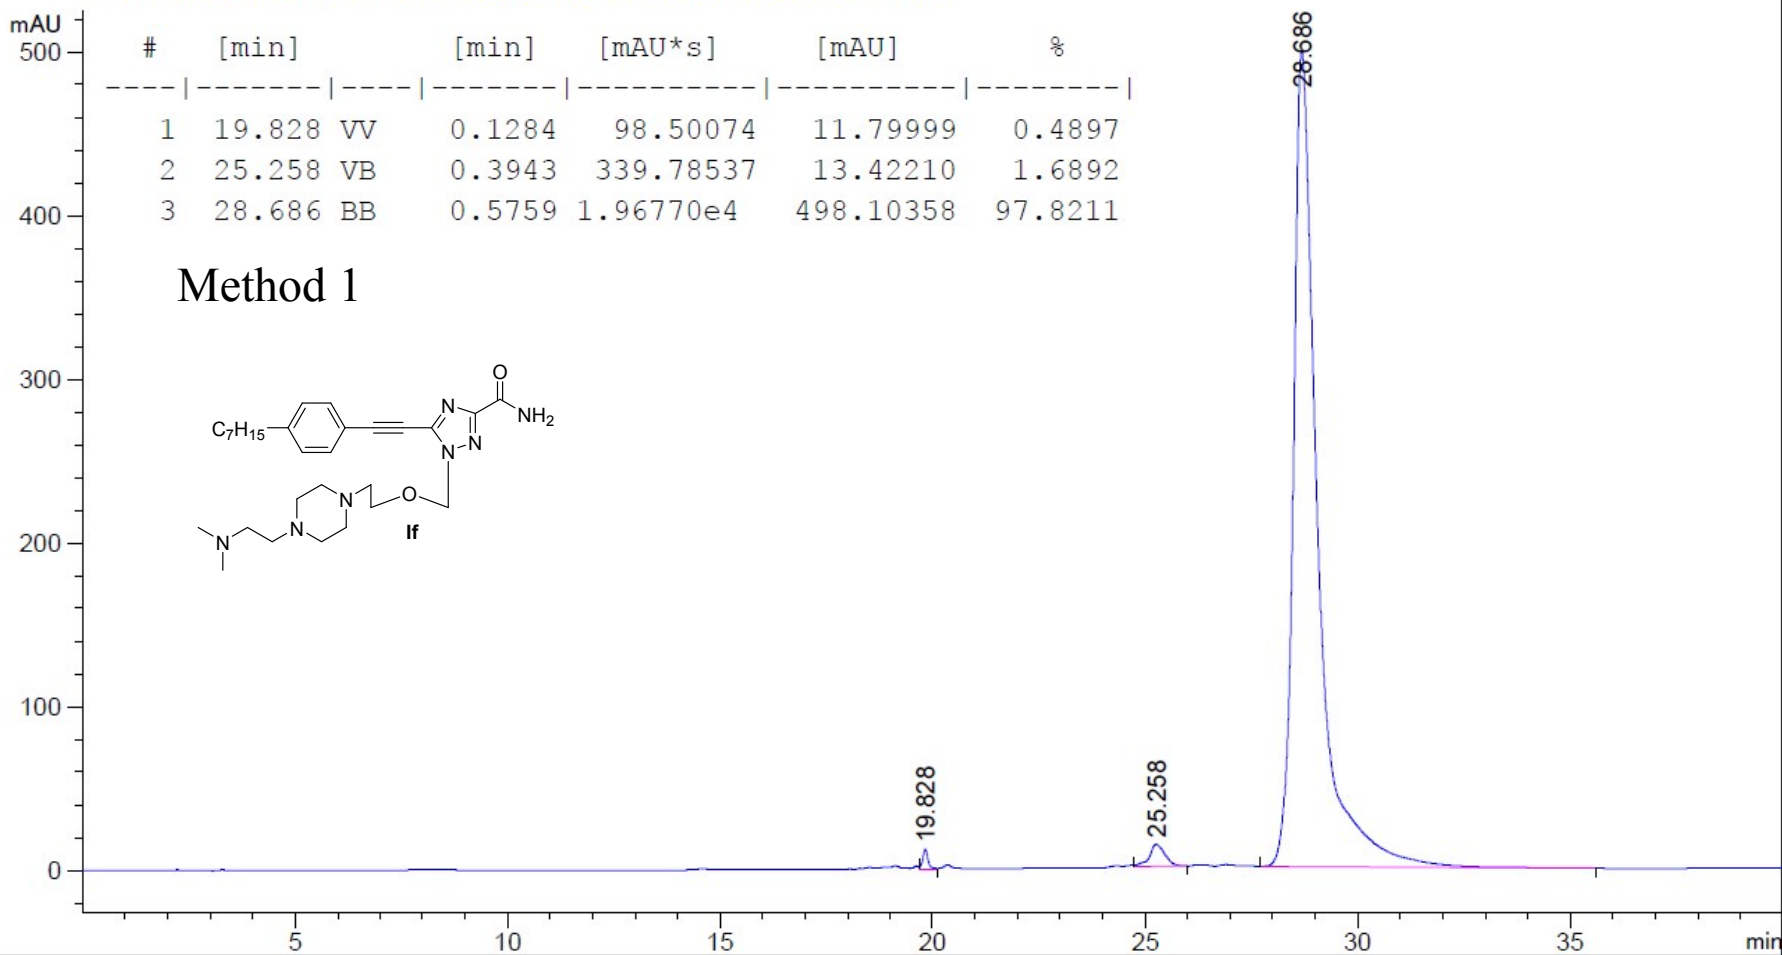

VWD1 A, Wavelength=282 nm (ZYH\2018-12-20 17-59-08.D)

| # | [min]  |    | [min]  | [mAU*s]   | [mAU]      | %       |
|---|--------|----|--------|-----------|------------|---------|
| 1 | 19.342 | VB | 0.1097 | 122.64332 | 16.69856   | 0.5710  |
| 2 | 20.055 | BB | 0.1188 | 81.21078  | 10.31775   | 0.3781  |
| 3 | 23.495 | BV | 0.1149 | 295.89969 | 38.41452   | 1.3777  |
| 4 | 23.814 | VV | 0.1770 | 222.40462 | 16.84797   | 1.0355  |
| 5 | 24.298 | VB | 0.1405 | 143.13937 | 14.71010   | 0.6665  |
| 6 | 24.935 | BV | 0.1327 | 2.06123e4 | 2387.08472 | 95.9712 |

### Method 2

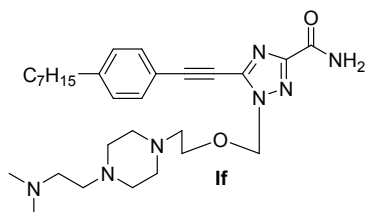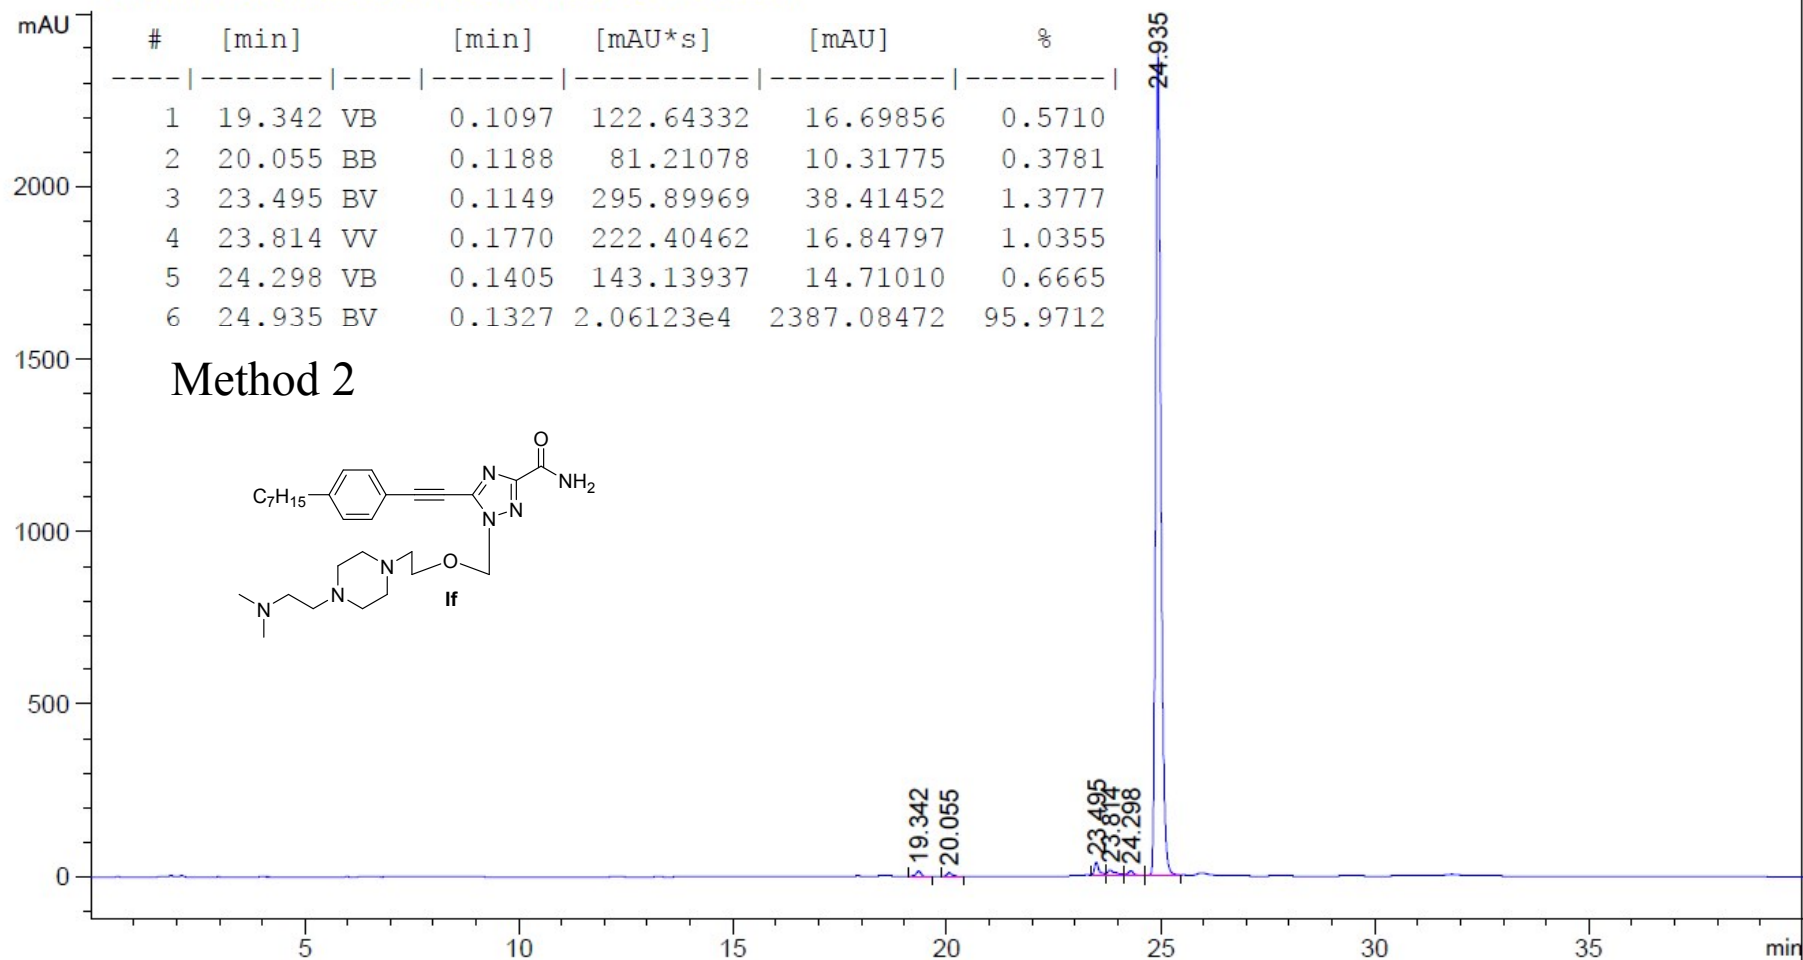

Supplement: d0cc04660d1.pdf [file d0cc04660d1.pdf]
